# Supplementary material for: Factors associated with online victimisation among Malaysian adolescents who use social networking sites: a cross-sectional study
Source: PubMed Central journal article supplement — BMJ Open. 2017 Jun 30;7(6):e014959. doi: 10.1136/bmjopen-2016-014959 (PMC5734467; doi:10.1136/bmjopen-2016-014959), 2017-06-30
Supplement: bmjopen-2016-014959.draft_revisions.pdf [file bmjopen-2016-014959.draft_revisions.pdf]

# BMJ Open

## Factors associated with online victimization among Malaysian adolescents who use social networking sites: a cross-sectional study

|                                 |                                                                                                                                             |
|---------------------------------|---------------------------------------------------------------------------------------------------------------------------------------------|
| Journal:                        | <i>BMJ Open</i>                                                                                                                             |
| Manuscript ID                   | bmjopen-2016-014959                                                                                                                         |
| Article Type:                   | Research                                                                                                                                    |
| Date Submitted by the Author:   | 13-Nov-2016                                                                                                                                 |
| Complete List of Authors:       | Marret, Mary; University of Malaya Faculty of Medicine, Paediatrics<br>Choo, Wan Yuen; University of Malaya, Social and Preventive Medicine |
| <b>Primary Subject Heading</b>: | Paediatrics                                                                                                                                 |
| Secondary Subject Heading:      | Public health                                                                                                                               |
| Keywords:                       | Community child health < PAEDIATRICS, EPIDEMIOLOGY, Information technology < BIOTECHNOLOGY & BIOINFORMATICS                                 |
|                                 |                                                                                                                                             |

SCHOLARONE™  
Manuscripts

1  
2  
3 **Title** Factors associated with online victimization among Malaysian  
4 adolescents who use social networking sites: a cross-sectional  
5 study  
6  
7  
8 **Corresponding author** Mary J Marret  
9 Department of Paediatrics  
10 University of Malaya  
11 Kuala Lumpur 50603  
12 Malaysia  
13 [marret@um.edu.my](mailto:marret@um.edu.my)  
14 Tel: 603 79492065  
15 Fax: 603 79494704  
16  
17  
18  
19 **Co-author** Wan-Yuen Choo  
20 Department of Social and Preventive Medicine  
21 University of Malaya  
22 Kuala Lumpur 50603  
23 Malaysia  
24  
25  
26 **Keywords** Internet, interpersonal relations, crime victims, adolescent,  
27 bullying  
28  
29 **Word Count** 3, 683  
30  
31  
32  
33  
34  
35  
36  
37  
38  
39  
40  
41  
42  
43  
44  
45  
46  
47  
48  
49  
50  
51  
52  
53  
54  
55  
56  
57  
58  
59  
60

## Abstract

### Objective:

To determine the prevalence of online interpersonal victimization among Malaysian adolescents using social networking sites (SNS) and its association with patterns of SNS use, offline victimization, offline perpetration as well as parental conflict.

### Methods:

A cross-sectional study of students from randomly selected public secondary schools in the state of Negeri Sembilan was conducted using an anonymous self-administered questionnaire. The questionnaire enquired about patterns of SNS use and included measures of online victimization, online perpetration, offline victimization and parental conflict.

### Results:

Of the 1487 respondents aged between 15 and 16 years, 92% had used at least one SNS. More than half of SNS users (52.2%) reported experiences of online victimization over the past 12 months. Males were significantly more likely to experience online harassment compared to females. There were no significant gender differences in experiences of unwanted sexual solicitation. Adolescents who engaged in perpetration behaviours online had almost 6 times higher odds of reporting frequent online victimization compared with online behaviours involving personal disclosure. There was a significant dose-response relationship between engagement in multiple types of online behavior and the risk of frequent online victimization. Both online and offline perpetration were associated with an increased risk of victimization. Those who were victimized offline or experienced parental conflict were twice as more likely to report online victimization.

### Conclusion:

Intervention to prevent online electronic aggression should target perpetration behavior both online and offline. Youth should be equipped with skills in communication and decision-making in relationships that can be applied across a spectrum of contexts both online and offline.

**Strengths and limitations of this study**

- Randomised population-based study
- High response rate
- Examines association of online victimization with behavior and experiences both online and offline
- Results are based on self-reporting which is subject to distortions from errors in recollection and social-desirability bias
- Cross-section design limits inferences regarding the direction of the associations found

For peer review only

## INTRODUCTION

Electronic aggression enacted through a range of behavior perpetrated on various platforms with the use of computers, cellphones and other electronic devices has been found to be a common experience among young persons [1-3]. Prevalence estimates of victimization in the form of harassment range from 5.5% to 72%, varying according to operational definitions and time frames applied for measurement [4-13]. Varying levels of unwelcome sexual aggression have been reported across Europe ranging from 1 in 10 (Germany, Iceland, Portugal) to 1 in 2 (Poland) [14] while U.S. surveys report declining trends from 1 in 5 youth Internet users to 9% over a decade [7].

In the absence of consensus on conceptual definitions, a number of terms with overlapping meanings such as electronic bullying, cyberbullying, cyber-aggression, internet bullying, internet harassment, online harassment or technology-based victimization have been used in reference to this form of violence [12 15 16]. The term “cyberbullying” is usually applied to online aggression perpetrated by peers that overlaps with traditional bullying whereas “online harassment” encompasses a broader range of offences which occur in a setting outside adult supervision and scrutiny [17]. Distinctive characteristics of electronic aggression include greater permanence of content, visibility to a wider audience and repeat victimization through replication without active involvement of the perpetrator [18-20]. The possibility of attacking remotely round-the-clock with multiple media makes the victimization experience more intrusive and difficult to escape [3 21]. Anonymity and blinding of perpetrators to their victim’s reactions may reduce inhibitions, foster deindividuation, reduce accountability and promote antinormative behaviours [22].

1  
2  
3 The relationship between online interpersonal harassment and aggressive or sexually exploitative  
4  
5 offline encounters as well as longer term mental health outcomes makes this an important public  
6  
7 health concern [5 14 23 24]. Exposure to electronic aggression among youth has been associated  
8  
9 with emotional disturbances, negative mental health outcomes and a range of internalizing and  
10  
11 externalizing behaviours as well as substance abuse problems [25].  
12  
13  
14  
15  
16

17  
18 Some studies examining demographic characteristics have found associations of victimization  
19  
20 with age and gender but not all have found a consistent pattern [1 3 8 9 11 14 23 25-36].  
21

22 Increased digital competence and patterns of online behavior such as increased time spent online  
23  
24 [8 10 14 17 37 38], disclosure of personal information to online acquaintances [23 39 40] and  
25  
26 harassing others online [40 41] have been found to be associated with increased risks of online  
27  
28 interpersonal victimization. Cumulative engagement in multiple activities individually identified  
29  
30 as risky has been associated with escalation of the risk of online interpersonal victimization [40].  
31  
32  
33

34 There is also evidence linking engagement in risky online behavior and online interpersonal  
35  
36 victimization with offline victimization experiences of child abuse and bullying, engagement in  
37  
38 offline physical relational and sexual aggression as well as conflicts with caregivers [10 17 24  
39  
40 41-43]. Available research suggests that determinants of exposure to online interpersonal  
41  
42 victimization and consequent harm are a composite of general factors such as adolescent-related  
43  
44 interests in social communication and sexual exploration, gender as well as cultural norms that  
45  
46 may interact with specific factors which enhance vulnerability [44 45]. Specific vulnerabilities  
47  
48 may be related to past or concurrent offline victimization, difficult family relationships,  
49  
50 alternative sexual orientation, problem behavior, substance abuse and accompanying psycho-  
51  
52  
53  
54  
55  
56  
57  
58  
59  
60

1  
2  
3 social difficulties which could influence the propensity to engage in problematic interactions  
4  
5 online [24 39 45].  
6  
7  
8  
9

10 The objective of this study was to determine the prevalence of online interpersonal victimization  
11 among Malaysian adolescents using social networking sites (SNS) and its association with  
12 patterns of SNS use, offline victimization, offline perpetration as well as parental conflict. There  
13 is a lack of academic research to explore risks encountered by young persons using digital  
14 communication from middle income Asian countries such as Malaysia. The SNS platform was  
15 selected to study this form of victimization based on its affordances as well as its popularity and  
16 importance among adolescents as a mode of communication [46 47]. The integration of various  
17 levels of private and public communication within the platform, accessibility to a network of  
18 contacts and the ability to display and exchange personal information in textual form as well as  
19 digital images simultaneously creates favourable conditions to develop social relationships and  
20 generates avenues for victimization [14 48 49].  
21  
22  
23  
24  
25  
26  
27  
28  
29  
30  
31  
32  
33  
34  
35  
36  
37  
38

39 Based on existing research, factors which could affect exposure to online interpersonal  
40 victimization were organized within a theoretical framework (Figure 1). The focus of this study  
41 was on variables associated with greater intensity of victimization as measured by frequency.  
42  
43  
44  
45  
46  
47

48 The following research questions were formulated:  
49

- 50 1. What is the prevalence of SNS usage and specific online behaviours among adolescents?
- 51 2. What is the prevalence of online or offline victimization and perpetration experienced by  
52 adolescents using SNS?  
53  
54  
55  
56  
57  
58  
59  
60

- 1
  - 2
  - 3
  - 4
  - 5
  - 6
  - 7
  - 8
  - 9
  - 10
  - 11
  - 12
  - 13
  - 14
  - 15
  - 16
  - 17
  - 18
  - 19
  - 20
  - 21
  - 22
  - 23
  - 24
  - 25
  - 26
  - 27
  - 28
  - 29
  - 30
  - 31
  - 32
  - 33
  - 34
  - 35
  - 36
  - 37
  - 38
  - 39
  - 40
  - 41
  - 42
  - 43
  - 44
  - 45
  - 46
  - 47
  - 48
  - 49
  - 50
  - 51
  - 52
  - 53
  - 54
  - 55
  - 56
  - 57
  - 58
  - 59
  - 60
3. If there an association between frequent online victimization and online behavior?
  4. Is there an association between frequent online victimization and experience of offline victimization, online perpetration, offline perpetration and parental conflict?

## METHOD

### Sample

The study was carried out with students from public secondary schools in the state of Negri Sembilan which has a heterogenous population reflecting the multi-ethnic composition of the country. Twelve schools ( 7 urban, 5 rural) were randomly selected from a list of 117 schools. For each selected school, 4-5 classes of Form 4 students were randomly selected. Sample size was calculated based on previous studies of online victimization reporting prevalence rates ranging from 5% to 55% [9 41 50]. An upper estimate that 55% of students would be likely to experience at least one type of victimization was used. We assumed a confidence interval of 95% and precision of 2.5%, inflated for missing data of 30%. These assumptions yielded a sample size of approximately 1560.

### Procedure

Students completed an anonymous self-administered paper and pencil questionnaire. Participation was voluntary with assurances that confidentiality would be maintained and responses would not influence school grades. The surveys were conducted in classes in a single session. Questionnaires were administered without the presence of class teachers. These procedures were necessary to increase response and disclosure. At the end of every



1  
2  
3 survey session, all students were provided with an information sheet containing a list of  
4 contacts of available support services and helplines.  
5  
6  
7  
8  
9

### 10 **Instrument**

11  
12 Details of the questionnaire are provided in supplementary file. The questionnaire  
13 contained items regarding socio-demographic characteristics and details regarding the use  
14 of social networking sites (SNS). A number of items measured risky online behavior  
15 relating to the public display of personal information, interaction with individuals  
16 encountered online without a prior offline introduction and disclosure of personal  
17 information to such individuals. Online victimization as well as online perpetration in the  
18 form of harassment and unwanted sexual solicitation in the previous 12 months was  
19 measured with questions adapted from the Growing Up with Media Survey and the  
20 Youth Internet Safety Survey [40 41]. Lifetime experiences of offline victimization were  
21 assessed using the validated ISPCAN Child Abuse Screening tool for young adults [51].  
22 Offline perpetration was measured in 3 domains (psychological, physical, sexual) with 4  
23 stem questions from the Growing Up with Media Survey. A validated version of the  
24 Measure of Parenting Style was used to assess parental conflict levels [52].  
25  
26  
27  
28  
29  
30  
31  
32  
33  
34  
35  
36  
37  
38  
39  
40  
41  
42  
43  
44  
45

### 46 **Ethical considerations**

47  
48 Institutional approval was granted by the Medical Ethics Committee of the University fo  
49 Malaya Medical Centre (MEC 890.97). Permission for data collection was obtained from  
50 the Ministry of Education and the state Department of Education of Negri Sembilan.  
51  
52  
53  
54  
55  
56  
57  
58  
59  
60

1  
2  
3 Informed consent was obtained from school authorities and parents. Students gave their  
4  
5  
6 assent to participation.  
7  
8  
9

## 10 **Statistical Analysis**

11  
12  
13  
14  
15 Data was analyzed using Statistical Package for Social Sciences (SPSS) windows version  
16  
17 22.0. Descriptive statistics of the type and frequency of specific risky online behaviours,  
18  
19 victimization and perpetration experiences was reported in proportions. Subgroup  
20  
21 analysis focusing on gender differences of these behaviours and experiences were also  
22  
23 examined and reported. Missing data of each variable of interest was less than 5% of the  
24  
25 cases, and listwise deletion analysis was conducted for complete cases. Multiple logistic  
26  
27 regression analysis was used to estimate the odds of reporting frequent online  
28  
29 victimization among SNS users given specific online behavior, types of online behavior  
30  
31 and engagement in multiple forms of online behavior after adjusting for demographic and  
32  
33 SNS use characteristics. Next, odds ratios were estimated to understand the association  
34  
35 between offline victimization, parental conflict as well as online perpetration with  
36  
37 frequent online victimization by further adjusting for the total number of online  
38  
39 behaviours besides demographic and SNS use characteristics.  
40  
41  
42  
43  
44  
45  
46  
47

## 48 **RESULTS**

### 49 **Socio-demographic characteristics**

50  
51  
52 The response rate from a total of 1,634 students was 91% after eliminating 3 refusals and  
53  
54 144 incomplete responses. The 1,487 respondents were from 15 to 16 years of age and  
55  
56  
57  
58  
59  
60

1  
2  
3 53.9% were female. They comprised predominantly Malay (69.6%) followed by 16.7%  
4  
5 Indian, 13.6% Chinese and 0.2% other ethnic groups. Approximately 90% were living  
6  
7 with both their parents. Seventy percent of their parents had completed at least a  
8  
9 secondary school education.  
10  
11

### 12 13 14 15 **Prevalence of SNS usage**

16  
17 Ninety-two percent of respondents had used at least one social networking site (SNS).

18  
19 The rest of the analysis was based on this subset denoted as “SNS users”. More than a  
20  
21 third of SNS users started at the age of 12 years or younger, below the recommended age  
22  
23 for SNS use. The most commonly used SNS was Facebook. Approximately half of the  
24  
25 adolescents possessed more than one profile and 45.4% accessed their profiles daily.  
26  
27

28  
29 Duration of weekly use ranged from 20 minutes to 100 hours with a median of 3 hours.

30  
31 Two-thirds had more than 300 “friends” or contacts in their profile, with a third reporting  
32  
33 more than a 1000 contacts. Communication and social interaction were found to be the  
34  
35 most important reasons for SNS use compared to other purposes such as leisure, keeping  
36  
37 up with peers and public participation. Half of the respondents (50.2%) acknowledged  
38  
39 using SNS to meet new people and make new friends. Three-quarters (74.5%) had  
40  
41 accepted requests to include unknown persons into the list of contacts with no significant  
42  
43 gender differences.  
44  
45  
46  
47  
48  
49

### 50 51 **Prevalence of Specific Risky Online Behaviour**

52  
53 The prevalence of different types of online behaviours involving personal information  
54  
55 disclosure, interaction with strangers and online perpetration is shown in Table 1. Of  
56  
57  
58  
59  
60

these, the most commonly reported was interacting with strangers while the posting of revealing images was the least common. With the exception of sending personal information to strangers, most of the listed behaviours including online perpetration were found to be more common among males. Approximately one in three had engaged in at least one of the 6 listed behaviours while nearly a third had engaged in 3 or more (31.8%). There was a significant upward trend of engagement in multiple risky online behaviours among males compared to females ( $p < 0.001$ ). (See Figure 2).

**Table 1 : Prevalence of specific risky online behaviors (N = 1364)**

| Specific online behaviour                               | Male<br>(N=646)<br>(%) | Female<br>(N=718)<br>(%) | Total<br>(N=1364)<br>(%) | p value          |
|---------------------------------------------------------|------------------------|--------------------------|--------------------------|------------------|
| Posting personal information on a public profile        | 36.1                   | 29.7                     | 32.7                     | <b>0.012</b>     |
| Sending personal information to a stranger <sup>1</sup> | 45.2                   | 47.5                     | 46.4                     | 0.397            |
| Posting revealing photographs or videos                 | 2.2                    | 0.8                      | 1.5                      | <b>&lt;0.001</b> |
| Interaction with stranger <sup>1</sup>                  | 89.9                   | 86.5                     | 88.1                     | 0.050            |
| Perpetration of harassment                              | 37.2                   | 27                       | 31.8                     | <b>&lt;0.001</b> |
| Perpetration of unwanted sexual solicitation            | 5.3                    | 0.4                      | 2.7                      | <b>&lt;0.001</b> |

*p* value based on Pearson's chi-square test comparing differences in risky online behaviours between genders

*p* value in bold significant at  $p < 0.05$

<sup>1</sup> "stranger" refers to a contact encountered solely through an online SNS without a prior face-to-face meeting

### Prevalence of Victimization

The prevalence of online victimization, online perpetration, offline victimization and offline perpetration by gender is shown in Table 2.

### Online victimization

1  
2  
3 More than half of the respondents (52.2%) had experienced some form of online  
4  
5  
6  
7  
8  
9  
10  
11  
12  
13  
14  
15  
16  
17  
18  
19  
20  
21  
22  
23  
24  
25  
26  
27  
28  
29  
30  
31  
32  
33  
34  
35  
36  
37  
38  
39  
40  
41  
42  
43  
44  
45  
46  
47  
48  
49  
50  
51  
52  
53  
54  
55  
56  
57  
58  
59  
60

More than half of the respondents (52.2%) had experienced some form of online victimization. The prevalence of online harassment was higher than unwanted sexual solicitation. Males were significantly more likely to experience online harassment compared to females. Whilst females were more likely to report unwanted sexual solicitation, the gender difference was not statistically significant. Frequent online victimization was slightly more common among males than females.

### **Online perpetration**

One in three respondents reported engaging in some form of perpetration online. Perpetration of online harassment or aggression was more common than unwanted sexual solicitation. Males had a significantly higher prevalence of both types of behavior and were more likely to be frequent perpetrators.

### **Offline victimization**

There was a high prevalence of offline victimization in general (60.3%) reported by the study population with about one-third of SNS users reporting experiences of multiple types of victimization. Physical victimization was the most prevalent, followed by psychological and sexual. There were no significant gender differences found among subtypes of victimization except for psychological victimization which was more prevalent among females.

### **Offline perpetration**

Offline perpetration was reported by 37.5% of the respondents. About a quarter of the respondents reported having perpetrated either psychological or physical aggression towards others. The prevalence of offline sexual perpetration was much lower, at around 3%, and was more commonly reported by males. About one in every 10 respondents had engaged in multiple types of perpetration.

**Table 2: Prevalence of victimization and perpetration experiences by types and gender**

| Type of Exposure                               | Male<br>(N=646)<br>% | Female<br>(N=718)<br>% | Total<br>(N=1364)<br>% | P value      |
|------------------------------------------------|----------------------|------------------------|------------------------|--------------|
| Online victimization                           | 54.8                 | 49.9                   | 52.2                   | 0.068        |
| <i>Types*</i>                                  |                      |                        |                        |              |
| Online harassment                              | 52.2                 | 43.3                   | 47.5                   | <0.001       |
| Sexual solicitation                            | 17.2                 | 20.8                   | 19.1                   | 0.094        |
| <i>Frequency of victimization</i>              |                      |                        |                        | <b>0.002</b> |
| Frequent victimization                         | 19.3                 | 12.4                   | 15.7                   |              |
| Infrequent victimization                       | 35.4                 | 37.5                   | 36.5                   |              |
| No victimization                               | 45.2                 | 50.1                   | 47.8                   |              |
| Online Perpetration                            | 37.6                 | 27.0                   | 32.0                   | <0.001       |
| <i>Types*</i>                                  |                      |                        |                        |              |
| Online harassment                              | 37.2                 | 27.0                   | 31.8                   | <0.001       |
| Sexual solicitation                            | 5.3                  | 0.4                    | 2.7                    | <0.001       |
| <i>Frequency of perpetration</i>               |                      |                        |                        | <0.001       |
| Frequent perpetration                          | 14.1                 | 6.8                    | 10.3                   |              |
| Infrequent perpetration                        | 23.5                 | 20.2                   | 21.8                   |              |
| No perpetration                                | 62.4                 | 73.0                   | 68.0                   |              |
| Offline Victimization                          | 58.2                 | 62.3                   | 60.3                   | 0.127        |
| <i>Types*</i>                                  |                      |                        |                        |              |
| Physical                                       | 50.2                 | 47.8                   | 48.9                   | 0.379        |
| Sexual                                         | 17.0                 | 17.0                   | 17.0                   | 0.986        |
| Psychological                                  | 26.3                 | 39.8                   | 33.4                   | <0.001       |
| <i>Multiple types of offline victimization</i> |                      |                        |                        |              |

|                                               |             |             |             |                  |
|-----------------------------------------------|-------------|-------------|-------------|------------------|
| None                                          | 37.7        | 41.8        | 39.7        | 0.130            |
| 1                                             | 30.5        | 28.7        | 29.5        |                  |
| ≥2                                            | 27.8        | 33.5        | 30.8        |                  |
| <b>Offline Perpetration</b>                   | <b>39.3</b> | <b>35.8</b> | <b>37.5</b> | <b>0.179</b>     |
| Types*                                        |             |             |             |                  |
| Physical                                      | 25.9        | 19.1        | 22.3        | <b>0.003</b>     |
| Psychological                                 | 23.4        | 23.5        | 23.5        | 0.943            |
| Sexual                                        | 5.1         | 1.5         | 3.2         | <b>&lt;0.001</b> |
| <i>Multiple types of offline perpetration</i> |             |             |             | <b>0.008</b>     |
| None                                          | 60.7        | 64.2        | 62.5        |                  |
| 1                                             | 25.9        | 27.7        | 26.8        |                  |
| ≥2                                            | 12.4        | 8.1         | 10.7        |                  |

\*Categories are not mutually exclusive

*p* value based on Pearson's chi-square test comparing victimization or perpetration experiences by gender.

### Association between risky online behaviour and online victimization

The association between frequent online victimization and online behaviour is summarized in Table 3. Results were adjusted for sociodemographic and SNS use characteristics. The posting of revealing photographs was the only behaviour involving personal disclosure which was associated with a higher risk of online victimization. Adolescents who engaged in perpetration behaviours had almost 6 times higher odds of reporting frequent online victimization, compared with online behaviours involving personal disclosure. There was a significant dose-response relationship between engagement in multiple types of online behaviour and the risk of frequent online victimization. Neither the length of time spent on SNS nor the number of people in the respondents' contact lists were found to be associated with frequent online victimization.

**Table 3. Association of online victimization with risky online behaviours**

| Odds of Online Victimization                     |                                                |                   |                                      |                   |
|--------------------------------------------------|------------------------------------------------|-------------------|--------------------------------------|-------------------|
| Characteristics                                  | Adjusted for Socio-demographic Characteristics |                   | Adjusted for SNS Use Characteristics |                   |
|                                                  | AOR (95% CI)                                   | p value           | AOR (95% CI)                         | p value           |
| <b>Specific Online behaviour</b>                 |                                                |                   |                                      |                   |
| Posting personal information on a public profile | 1.1 (0.7-1.4)                                  | 0.913             | 1.1 (0.7-1.3)                        | 0.830             |
| Sending personal information to strangers        | 1.7 (1.3-2.4)                                  | 0.001             | 1.2 (0.9-1.7)                        | 0.309             |
| Interaction with strangers                       | 1.4 (0.8-2.4)                                  | 0.198             | 1.1(0.6-2.0)                         | 0.682             |
| Posting revealing pictures                       | <b>3.0 (1.2-7.5)</b>                           | <b>0.018</b>      | <b>3.5(1.4-8.9)</b>                  | <b>0.007</b>      |
| Perpetration of harassment                       | <b>6.1 (4.4-8.6)</b>                           | <b>&lt; 0.001</b> | <b>5.6 (4.0-7.9)</b>                 | <b>&lt;0.001</b>  |
| Perpetration of unwanted sexual solicitation     | <b>4.1 (1.9-8.5)</b>                           | <b>&lt; 0.001</b> | <b>2.2 (1.1-4.4)</b>                 | <b>0.030</b>      |
| <b>Types of online behaviour</b>                 |                                                |                   |                                      |                   |
| Personal disclosure behaviours                   | 1.7 (0.8-3.4)                                  | 0.157             | 1.3 (0.6-2.6)                        | 0.471             |
| Perpetration behaviours                          | <b>6.3 (4.5-8.4)</b>                           | <b>&lt; 0.001</b> | <b>6.2 (4.5-8.6)</b>                 | <b>&lt; 0.001</b> |
| <b>Multiple types of online behaviours</b>       |                                                |                   |                                      |                   |
| ≤1                                               | 1                                              |                   | 1                                    |                   |
| 2                                                | <b>2.2 (1.4-3.6)</b>                           | <b>0.001</b>      | <b>2.4 (1.5-3.8)</b>                 | <b>&lt;0.001</b>  |
| 3                                                | <b>4.1 (2.5-6.7)</b>                           | <b>&lt; 0.001</b> | <b>4.2 (2.6-6.7)</b>                 | <b>&lt; 0.001</b> |
| ≥4                                               | <b>5.9 (3.4-10.5)</b>                          | <b>&lt; 0.001</b> | <b>6.4 (3.7-11.1)</b>                | <b>&lt; 0.001</b> |

Abbreviations: AOR adjusted odds ratio; CI, confidence interval

Personal disclosure behaviours consist of posting and sending personal information, interacting with strangers and posting revealing pictures

Perpetration behaviours include adolescents perpetrating harassment and unwanted sexual solicitation

Odds ratio are adjusted for (1) socio-demographic characteristics (ethnicity, gender, geographic location, parent's relationship status and parent's education level) and (2) SNS use (frequency & age of SNS access)

## Correlates of Frequent Online Victimization



Both online and offline perpetration were found to be associated with an increased risk of online victimization when adjusted for sociodemographic and internet use characteristics. The observed relationship remained strongly significant after adjustment for total number of online behaviours (see Table 4). Specifically, adolescents who engaged in frequent online perpetration were 12 times more likely to report frequent online victimization. Similarly, an upward trend of frequent online victimization was seen among those who engaged in multiple types of perpetration.

While adolescents who were victimized in the offline world were twice more likely to report online victimization, the odds did not increase with exposure to multiple types of offline victimization. Respondents who experienced high levels of parental conflict were twice more likely to be harassed or victimized online.

**Table 4. Association between online victimization with offline and online correlates**

| Characteristics                        | Odds of Online Victimization                               |                  |                                            |                  |
|----------------------------------------|------------------------------------------------------------|------------------|--------------------------------------------|------------------|
|                                        | Model 1                                                    |                  | Model 2                                    |                  |
|                                        | Adjusted for Socio-demographic and SNS Use Characteristics |                  | Adjusted for Total No. of Online Behaviors |                  |
|                                        | AOR (95% CI)                                               | P value          | AOR (95% CI)                               | P value          |
| <b>Online Perpetration</b>             |                                                            |                  |                                            |                  |
| None                                   | 1                                                          | NA               | 1                                          | NA               |
| Infrequent                             | <b>2.6 (1.8-4.0)</b>                                       | <b>&lt;0.001</b> | <b>1.8 (1.5-2.0)</b>                       | <b>&lt;0.001</b> |
| Frequent                               | <b>21.8 (13.8-34.5)</b>                                    | <b>&lt;0.001</b> | <b>12.5 (8.2-18.9)</b>                     | <b>&lt;0.001</b> |
| <b>Offline Perpetration</b>            |                                                            |                  |                                            |                  |
| None                                   | 1                                                          | NA               | 1                                          | NA               |
| Offline perpetration                   | <b>2.0 (1.5-2.8)</b>                                       | <b>&lt;0.001</b> | <b>1.6 (1.2-2.2)</b>                       | <b>&lt;0.001</b> |
| Multiple types of offline perpetration |                                                            |                  |                                            |                  |

|                                                |                        |                  |                       |                  |
|------------------------------------------------|------------------------|------------------|-----------------------|------------------|
| 0                                              | 1                      | NA               | 1                     | NA               |
| 1                                              | <b>1.6 (1.1-2.3)</b>   | <b>0.013</b>     | 1.3 (0.9-1.8)         | 0.171            |
| 2                                              | <b>2.9 (1.8-4.7)</b>   | <b>&lt;0.001</b> | <b>2.4 (1.5-3.7)</b>  | <b>&lt;0.001</b> |
| 3                                              | <b>12.3 (3.0-50.2)</b> | <b>&lt;0.001</b> | <b>7.9 (2.3-27.2)</b> | <b>0.001</b>     |
| <b>Offline Victimization</b>                   |                        |                  |                       |                  |
| None                                           | 1                      | NA               | 1                     | NA               |
| Offline victimization                          | <b>1.8 (1.3-2.6)</b>   | <b>&lt;0.001</b> | <b>1.7 (1.2-2.3)</b>  | <b>0.001</b>     |
| <b>Multiple types of offline victimization</b> |                        |                  |                       |                  |
| 0                                              | 1                      | NA               | 1                     | NA               |
| 1                                              | 1.4 (0.9-2.1)          | 0.136            | 1.0 (0.7-1.6)         | 0.654            |
| 2                                              | 2.2 (1.4-3.4)          | <0.001           | 1.4 (0.9-2.1)         | 0.117            |
| 3                                              | 3.1 (1.8-5.5)          | <0.001           | 1.6 (0.9-2.7)         | 0.075            |
| <b>Parental Conflict</b>                       |                        |                  |                       |                  |
| Low                                            | 1                      | NA               | 1                     | NA               |
| Medium                                         | 1.5 (0.9-2.3)          | 0.067            | <b>1.6 (1.5-1.9)</b>  | <b>&lt;0.001</b> |
| High                                           | <b>2.2(1.5-3.2)</b>    | <b>&lt;0.001</b> | <b>1.7(1.2-2.51)</b>  | <b>0.003</b>     |

AOR, adjusted odds ratio; CI, confidence interval; NA, data not applicable

Model 1: Odds ratios were adjusted for sociodemographic (ethnicity, gender, geographic location, parent's relationship status and parent's education level) and SNS use characteristics (frequency of access and age of 1<sup>st</sup> access)

Model 2: Odds ratios were adjusted for total number of online behaviours (posting personal information on a public profile, posting revealing photographs or videos, sending personal information to strangers, interacting with strangers, perpetration of harassment and unwanted sexual solicitation), besides demographic and SNS use.

## DISCUSSION

The high prevalence of SNS users and reported motivation for use are consistent with studies in Europe and other local studies reflecting utilization of this platform as part of normative adolescent practice [47 50 53-55]. Initiation of SNS use at a young age mirrors findings in Europe where 27% of 9-10 year olds said they had a SNS profile [56]. Knowledge of these demographic patterns should be applied in any initiative to address the overall safety, well-being and development of youth [57].

1  
2  
3  
4  
5  
6 Higher levels of interaction with unknown persons were found than what has been  
7  
8 previously reported in the U.S. [58] or locally [50]. This may be due to adolescents  
9  
10 maximizing avenues for social communication and sexual exploration away from adult  
11  
12 scrutiny, particularly within the context of a conservative Asian and predominantly  
13  
14 Muslim community. It could also be the consequence of boredom, curiosity and social  
15  
16 inhibitions in face-to-face encounters [59]. When such behaviour is normative, a  
17  
18 communication-based approach to education on safeguarding individual privacy and  
19  
20 security is more likely to be effective than a restrictive approach [60].  
21  
22  
23  
24  
25  
26

27 The prevalence of online harassment in this study falls within the wide range of existing  
28  
29 prevalence estimates of 5.5% and 72% [4-11], confirming that the problem extends to  
30  
31 youth in this region and needs to be addressed. The odds of experiencing harassment are  
32  
33 marginally higher among youth who report online interaction with strangers suggesting  
34  
35 that harassment originates predominantly from known persons. This may include peers  
36  
37 who concurrently bully them offline as has been reported by others [11 42 61], but could  
38  
39 not be verified within this study design. The higher prevalence of online harassment  
40  
41 compared to unwanted sexual solicitation is similar to the pattern of offline victimization,  
42  
43 where levels of physical and psychological victimization exceed sexual victimization.  
44  
45  
46  
47  
48  
49

50 The higher levels of harassment experienced by boys in this study has also been reported  
51  
52 in a few Asian studies [11 23]. This is likely to be related to their increased tendency  
53  
54 towards online perpetration, which was found to be the most important predictor of  
55  
56  
57  
58  
59  
60

1  
2  
3 frequent online victimization. In contrast, a number of studies have found increased  
4  
5 electronic aggression directed at girls or no gender differences. We postulate that cultural  
6  
7 conditioning in Asian societies where assertiveness is emphasized in boys and politeness  
8  
9 expected of girls may partly account for these differences [11]. These differences  
10  
11 reinforce the value of conducting local research to determine the applicability of  
12  
13 international data to specific settings.  
14  
15  
16  
17  
18  
19

20 The prevalence of unwanted sexual solicitation in this study is higher than recent U.S.  
21  
22 studies whereas research from Europe has revealed a wide variation [7 9]. The steady  
23  
24 decline in the U.S. has been attributed to increased consciousness with the introduction of  
25  
26 Internet safety education programmes as well as changing patterns of use and better law  
27  
28 enforcement. In comparison, the development of safety education programmes are still in  
29  
30 their relative infancy in Malaysia. In contrast to other studies, the absence of gender  
31  
32 differences here is consistent with previous Malaysian studies on offline victimization  
33  
34 [62 63]. This could be related to greater involvement of boys with online perpetration and  
35  
36 risky behaviour such as posting of revealing images on their SNS profile. With the  
37  
38 widespread utilization of SNS by the majority of youth for an ever-growing range of  
39  
40 functions related to leisure activities and social communication, it is postulated that the  
41  
42 time spent online may not be a discriminator of victimization risk, unlike earlier studies  
43  
44 [17]. This may explain why the duration of time spent online was not a predictor of  
45  
46 victimization in this study.  
47  
48  
49  
50  
51  
52  
53  
54  
55  
56  
57  
58  
59  
60

1  
2  
3  
4  
5  
6  
7  
8  
9  
10  
11  
12  
13  
14  
15  
16  
17  
18  
19  
20  
21  
22  
23  
24  
25  
26  
27  
28  
29  
30  
31  
32  
33  
34  
35  
36  
37  
38  
39  
40  
41  
42  
43  
44  
45  
46  
47  
48  
49  
50  
51  
52  
53  
54  
55  
56  
57  
58  
59  
60

Personal information disclosure other than the posting of revealing images was associated with a marginal increase in the odds of online victimization. Marked risk escalation occurred only when this was combined with a number of other behaviours, extending the evidence found in another U.S.-based study where engagement in 4 types of online behaviour was found to be a tipping point [40]. Among component behaviours, uploading personal revealing photographs and online perpetration were major contributors to risk in this study. Involvement in 4 or more listed types of behaviour was seen in less than 10% of respondents in this study. Participation in multiple types of risky behaviour may be a possible marker of individuals with a greater willingness to forgo privacy for self-disclosure as well as to provoke others [2 48 60 64]. Instead of targeting individual types of behaviour in isolation, understanding the psyche of adolescents who belong to this high-risk group may yield more useful strategies for prevention and suggests directions for future research.

Demonstration of the association of frequent online victimization with offline victimization experiences and parental conflict underlines the importance of taking into account broader contextual factors in formulating an understanding of contributors to the risk of online victimization. The adverse psychosocial impact of previous victimization may result in emotional dysregulation and lack of social competence. Convergence of psychosocial difficulties with family conflict and weak family ties may increase an individual's risk of becoming a target of victimization in different ways. Affected persons may be drawn into intimate interactions online, exercise less discretion in their uploading

1  
2  
3 of content and have an increased propensity to express hostility in their online exchanges  
4  
5 [24 39 41].  
6  
7  
8  
9

10 The study findings that both online and offline perpetration are important predictors of  
11 online victimization adds to evidence from previous studies [39]. Examining underlying  
12 motivations and triggers of this form of aggression would be a logical step to address  
13 online victimization. As adolescents seek to establish their identity and grapple with  
14 issues relating to intimacy and sexuality [44], aggression may be employed as a strategy  
15 offline and online to establish and maintain social dominance. This could result in  
16 subsequent targeting for victimization by rivals [65].  
17  
18  
19  
20  
21  
22  
23  
24  
25  
26  
27  
28

29 The following study limitations are acknowledged. Results are based on self-reporting  
30 which is subject to distortion from errors in recollection and social-desirability biases that  
31 could result in underreporting [44]. The high response rate and the anonymity assured in  
32 the study increased the possibility of reporting an unwanted experience among the  
33 adolescents. The cross-sectional design limits inferences regarding the direction of  
34 associations found. The relationship between perpetration and victimization may be  
35 bidirectional, i.e. perpetration could result in victimization or be a reaction to  
36 victimization, extending across online and offline interaction. In addition, other factors  
37 such as academic performance [23 30], sexual orientation [66] and conduct problems [41  
38 42] which have been found to be associated with online victimization were not explored  
39 in this study.  
40  
41  
42  
43  
44  
45  
46  
47  
48  
49  
50  
51  
52  
53  
54  
55  
56  
57  
58  
59  
60

## CONCLUSION

The study establishes that perpetration behaviour both online and offline should be an important target for intervention to prevent online electronic aggression. While specific affordances within platforms may facilitate victimization and evolve with development of new technologies, the focus should be on equipping youth with skills in communication and decision-making in relationships that can be applied across a spectrum of contexts both online and offline [57].

## CONTRIBUTORSHIP STATEMENT

Mary J Marret conceived the study design, supervised the data collection and wrote the manuscript.

Wan-Yuen Choo carried out the statistical analysis and co-wrote the manuscript.

## ACKNOWLEDGMENTS

The authors express their gratitude to the Malaysian Ministry of Education and various schools for study approval, the University of Malaya for funding and administrative support and Ms Mogana Subramani for assistance with data collection. They thank the students for their willingness to participate in this study.

## COMPETING INTERESTS

The authors have no competing interests to declare.

## FUNDING

This study was funded by a grant (UMRG 392//11HTM) from the University of Malaya.

## DATA SHARING STATEMENT

The dataset for this research has not yet been uploaded into a data repository.

## REFERENCES

1. Kowalski RM, Limber SP. Electronic Bullying Among Middle School Students. *Journal of Adolescent Health* 2007;**41**(6, Supplement):S22-S30 doi: <http://dx.doi.org/10.1016/j.jadohealth.2007.08.017>[published Online First: Epub Date]].
2. Lenhart A, Madden M, Smith A, et al. *Teens, Kindness and Cruelty on Social Network Sites*. Washington D.C.: Pew Research Center, 2011.
3. Tokunaga RS. Following you home from school: A critical review and synthesis of research on cyberbullying victimization. *Computers in Human Behavior* 2010;**26**(3):277-87 doi: <http://dx.doi.org/10.1016/j.chb.2009.11.014>[published Online First: Epub Date]].
4. Arslan S, Savaser S, Hallett V, et al. Cyberbullying among primary school students in Turkey: self-reported prevalence and associations with home and school life. *Cyberpsychology, Behavior And Social Networking* 2012;**15**(10):527-33 doi: 10.1089/cyber.2012.0207[published Online First: Epub Date]].
5. Finkelhor D, Mitchell K, Wolak J. *Online Victimization: A Report on the Nation's Youth*. Virginia: National Center for Missing and Exploited Children, 2000.
6. Hinduja S, Patchin JW. Social influences on cyberbullying behaviors among middle and high school students. *Journal of Youth and Adolescence* 2013;**42**(5):711-22 doi: 10.1007/s10964-012-9902-4[published Online First: Epub Date]].
7. Jones LM, Mitchell KJ, Finkelhor D. Trends in Youth Internet Victimization: Findings From Three Youth Internet Safety Surveys 2000–2010. *Journal of Adolescent Health* 2012;**50**(2):179-86 doi: 10.1016/j.jadohealth.2011.09.015[published Online First: Epub Date]].
8. Juvonen J, Gross EF. Extending the School Grounds?—Bullying Experiences in Cyberspace. *Journal of School Health* 2008;**78**(9):496-505
9. Staksrud E, Livingstone S. Children and online risk. *Information, Communication & Society* 2009;**12**(3):364-87 doi: 10.1080/13691180802635455[published Online First: Epub Date]].
10. Ybarra ML, Mitchell KJ. Online aggressor/targets, aggressors, and targets: a comparison of associated youth characteristics. *Journal of Child Psychology and Psychiatry* 2004;**45**(7):1308-16 doi: 10.1111/j.1469-7610.2004.00328.x[published Online First: Epub Date]].
11. Zhou Z, Tang H, Tian Y, et al. Cyberbullying and its risk factors among Chinese high school students. *School Psychology International* 2013;**34**(6):630-47 doi: 10.1177/0143034313479692[published Online First: Epub Date]].
12. David-Ferdon C, Hertz MF. Electronic Media, Violence, and Adolescents: An Emerging Public Health Problem. *Journal of Adolescent Health* 2007;**41**(6, Supplement):S1-S5 doi: <http://dx.doi.org/10.1016/j.jadohealth.2007.08.020>[published Online First: Epub Date]].
13. Salmivalli C, Sainio M, Hodges EVE. Electronic victimization: correlates, antecedents, and consequences among elementary and middle school students. *Journal Of Clinical Child And*



- Adolescent Psychology: The Official Journal For The Society Of Clinical Child And Adolescent Psychology, American Psychological Association, Division 53 2013;**42**(4):442-53 doi: 10.1080/15374416.2012.759228[published Online First: Epub Date]].
14. Staksrud E, Ólafsson K, Livingstone S. Does the use of social networking sites increase children's risk of harm? *Computers in Human Behavior* 2013;**29**(1):40-50 doi: <http://dx.doi.org/10.1016/j.chb.2012.05.026>[published Online First: Epub Date]].
  15. Selkie EM, Fales JL, Moreno MA. Cyberbullying Prevalence Among US Middle and High School-Aged Adolescents: A Systematic Review and Quality Assessment. *Journal of Adolescent Health* 2015;**58**(2):125-33 doi: 10.1016/j.jadohealth.2015.09.026[published Online First: Epub Date]].
  16. Korchmaros JD, Mitchell KJ, Ybarra ML. Technology-based interpersonal victimization: predictors of patterns of victimization over time. *Journal Of Interpersonal Violence* 2014;**29**(7):1297-317 doi: 10.1177/0886260513506277[published Online First: Epub Date]].
  17. Wolak J, Mitchell KJ, Finkelhor D. Does Online Harassment Constitute Bullying? An Exploration of Online Harassment by Known Peers and Online-Only Contacts. *Journal of Adolescent Health* 2007;**41**(6, Supplement):S51-S58 doi: <http://dx.doi.org/10.1016/j.jadohealth.2007.08.019>[published Online First: Epub Date]].
  18. Chang C. Internet Safety Survey: Who Will Protect the Children ? *Berkeley Technology Law Journal* 2010;**25**(1):501-27
  19. Sourander A, Klomek AB, Ikonen M, et al. Psychosocial risk factors associated with cyberbullying among adolescents: A population-based study. *Archives of General Psychiatry* 2010;**67**(7):720-28 doi: 10.1001/archgenpsychiatry.2010.79[published Online First: Epub Date]].
  20. Menesini E, Nocentini A, Palladino BE, et al. Cyberbullying definition among adolescents: a comparison across six European countries. *Cyberpsychology, Behavior And Social Networking* 2012;**15**(9):455-63 doi: 10.1089/cyber.2012.0040[published Online First: Epub Date]].
  21. Hinduja S, Patchin JW. Offline consequences of online victimization: school violence and delinquency. *Journal of School Violence* 2007;**6**(3):89-112
  22. Brandtzæg PB, Staksrud E, Hagen I, et al. Norwegian Children's Experiences of Cyberbullying When Using Different Technological Platforms. *Journal of Children and Media* 2009;**3**(4):349-65 doi: 10.1080/17482790903233366[published Online First: Epub Date]].
  23. Chang F-C, Lee C-M, Chiu C-H, et al. Relationships among cyberbullying, school bullying, and mental health in Taiwanese adolescents. *The Journal Of School Health* 2013;**83**(6):454-62 doi: 10.1111/josh.12050[published Online First: Epub Date]].
  24. Wolak J, Finkelhor D, Mitchell KJ, et al. Online "Predators" and their victims - Myths, realities, and implications for prevention and treatment. *Am Psychol* 2008;**63**(2):111-28 doi: Doi 10.1037/0003-066x.63.2.111[published Online First: Epub Date]].
  25. Elgar FJ, Napoletano A, Saul G, et al. Cyberbullying victimization and mental health in adolescents and the moderating role of family dinners. *JAMA Pediatrics* 2014;**168**(11):1015-22 doi: 10.1001/jamapediatrics.2014.1223[published Online First: Epub Date]].
  26. Lindfors PL, Kaltiala-Heino R, Rimpelä AH. Cyberbullying among Finnish adolescents--a population-based study. *BMC Public Health* 2012;**12**:1027-27 doi: 10.1186/1471-2458-12-1027[published Online First: Epub Date]].
  27. Shapka JD, Law DM. Does one size fit all? Ethnic differences in parenting behaviors and motivations for adolescent engagement in cyberbullying. *Journal of Youth and Adolescence* 2013;**42**(5):723-38 doi: 10.1007/s10964-013-9928-2[published Online First: Epub Date]].
  28. Williams KR, Guerra NyG. Prevalence and Predictors of Internet Bullying. *Journal of Adolescent Health* 2007;**41**(6, Supplement):S14-S21 doi: <http://dx.doi.org/10.1016/j.jadohealth.2007.08.018>[published Online First: Epub Date]].

- 1
  - 2
  - 3
  - 4
  - 5
  - 6
  - 7
  - 8
  - 9
  - 10
  - 11
  - 12
  - 13
  - 14
  - 15
  - 16
  - 17
  - 18
  - 19
  - 20
  - 21
  - 22
  - 23
  - 24
  - 25
  - 26
  - 27
  - 28
  - 29
  - 30
  - 31
  - 32
  - 33
  - 34
  - 35
  - 36
  - 37
  - 38
  - 39
  - 40
  - 41
  - 42
  - 43
  - 44
  - 45
  - 46
  - 47
  - 48
  - 49
  - 50
  - 51
  - 52
  - 53
  - 54
  - 55
  - 56
  - 57
  - 58
  - 59
  - 60
29. Hinduja S, Patchin JW. Cyberbullying: An Exploratory Analysis of Factors Related to Offending and Victimization. *Deviant Behavior* 2008;**29**(2):129-56 doi: 10.1080/01639620701457816[published Online First: Epub Date]].
30. Floros GD, Siomos KE, Fisoun V, et al. Adolescent online cyberbullying in Greece: the impact of parental online security practices, bonding, and online impulsiveness. *The Journal Of School Health* 2013;**83**(6):445-53 doi: 10.1111/josh.12049[published Online First: Epub Date]].
31. Wang J, Iannotti RJ, Nansel TR. School Bullying Among Adolescents in the United States: Physical, Verbal, Relational, and Cyber. *Journal of Adolescent Health* 2009;**45**(4):368-75 doi: <http://dx.doi.org/10.1016/j.jadohealth.2009.03.021>[published Online First: Epub Date]].
32. Aricak T, Siyahhan S, Uzunhasanoglu A, et al. Cyberbullying among Turkish adolescents. *Cyberpsychology & behavior : the impact of the Internet, multimedia and virtual reality on behavior and society* 2008;**11**(3):253-61 doi: 10.1089/cpb.2007.0016[published Online First: Epub Date]].
33. Li Q. Cyberbullying in Schools: A Research of Gender Differences. *School Psychology International* 2006;**27**(2):157-70 doi: 10.1177/0143034306064547[published Online First: Epub Date]].
34. Nansel TR, Overpeck M, Pilla RS, et al. Bullying behaviors among us youth: Prevalence and association with psychosocial adjustment. *JAMA* 2001;**285**(16):2094-100 doi: 10.1001/jama.285.16.2094[published Online First: Epub Date]].
35. Ortega R, Elipe P, Mora-Merchan JA, et al. The Emotional Impact on Victims of Traditional Bullying and Cyberbullying. *Zeitschrift für Psychologie / Journal of Psychology* 2009;**217**(4):197-204 doi: doi:10.1027/0044-3409.217.4.197[published Online First: Epub Date]].
36. Wade A, Beran T. Cyberbullying: The New Era of Bullying. *Canadian Journal of School Psychology* 2011;**26**(1):44-61 doi: 10.1177/0829573510396318[published Online First: Epub Date]].
37. Mishna F, Khoury-Kassabri M, Gadalla T, et al. Risk factors for involvement in cyber bullying: Victims, bullies and bully-victims. *Children and Youth Services Review* 2012;**34**(1):63-70 doi: <http://dx.doi.org/10.1016/j.childyouth.2011.08.032>[published Online First: Epub Date]].
38. Navarro R, Serna C, Martínez V, et al. The role of Internet use and parental mediation on cyberbullying victimization among Spanish children from rural public schools. *European Journal of Psychology of Education* 2013;**28**(3):725-45 doi: 10.1007/s10212-012-0137-2[published Online First: Epub Date]].
39. Mitchell KJ, Finkelhor D, Wolak J. Youth internet users at risk for the most serious online sexual solicitations. *Am J Prev Med* 2007;**32**(6):532-37
40. Ybarra M, Mitchell KJ, Finkelhor D, et al. Internet Prevention Messages: Targeting the Right Online Behaviors. *Archives of Pediatrics and Adolescent Medicine* 2007;**161**(2):138-45
41. Ybarra ML, Espelage DL, Mitchell KJ. The Co-occurrence of Internet Harassment and Unwanted Sexual Solicitation Victimization and Perpetration: Associations with Psychosocial Indicators. *Journal of Adolescent Health* 2007;**41**(6, Supplement):S31-S41 doi: <http://dx.doi.org/10.1016/j.jadohealth.2007.09.010>[published Online First: Epub Date]].
42. Ybarra ML, Diener-West M, Leaf PJ. Examining the Overlap in Internet Harassment and School Bullying: Implications for School Intervention. *Journal of Adolescent Health* 2007;**41**(6, Supplement):S42-S50 doi: <http://dx.doi.org/10.1016/j.jadohealth.2007.09.004>[published Online First: Epub Date]].
43. Modecki KL, Barber BL, Vernon L. Mapping developmental precursors of cyber-aggression: trajectories of risk predict perpetration and victimization. *Journal of Youth and Adolescence* 2013;**42**(5):651-61 doi: 10.1007/s10964-012-9887-z[published Online First: Epub Date]].
44. Valkenburg PM, Peter J. Online communication among adolescents: an integrated model of its attraction, opportunities, and risks. *Journal of Adolescent Health* 2011;**48**(2):121-27

- 1  
2  
3  
4  
5  
6  
7  
8  
9  
10  
11  
12  
13  
14  
15  
16  
17  
18  
19  
20  
21  
22  
23  
24  
25  
26  
27  
28  
29  
30  
31  
32  
33  
34  
35  
36  
37  
38  
39  
40  
41  
42  
43  
44  
45  
46  
47  
48  
49  
50  
51  
52  
53  
54  
55  
56  
57  
58  
59  
60
45. Wolak J, Finkelhor D, Mitchell K. Is talking online to unknown people always risky? Distinguishing online interaction styles in a national sample of youth Internet users. *Cyberpsychology & Behavior* 2008;**11**(3):340-43
  46. Moreno MA. Social networking sites and adolescents. *Pediatric Annals* 2010;**39**(9):565-68 doi: [10.3928/00904481-20100825-07](https://doi.org/10.3928/00904481-20100825-07)[published Online First: Epub Date]].
  47. Tsitsika AK, Tzavela EC, Janikian M, et al. Online Social Networking in Adolescence: Patterns of Use in Six European Countries and Links With Psychosocial Functioning. *Journal of Adolescent Health* 2014;**55**(1):141-47 doi: <http://dx.doi.org/10.1016/j.jadohealth.2013.11.010>[published Online First: Epub Date]].
  48. Mesch GS. Parental Mediation, Online Activities, and Cyberbullying. *CyberPsychology & Behavior* 2009;**12**(4):387-93 doi: 10.1089/cpb.2009.0068[published Online First: Epub Date]].
  49. Messias E, Kindrick K, Castro J. School bullying, cyberbullying, or both: correlates of teen suicidality in the 2011 CDC Youth Risk Behavior Survey. *Comprehensive Psychiatry* 2014;**55**(5):1063-68 doi: 10.1016/j.comppsy.2014.02.005[published Online First: Epub Date]].
  50. Shin W, Ismail N. Exploring the Role of Parents and Peers in Young Adolescents' Risk Taking on Social Networking Sites. *CyberPsychology, Behavior & Social Networking* 2014;**17**(9):578-83 doi: 10.1089/cyber.2014.0095[published Online First: Epub Date]].
  51. Dunne MP, Zolotor AJ, Runyan DK, et al. ISPCAN Child Abuse Screening Tools Retrospective version (ICAST-R): Delphi study and field testing in seven countries. *Child Abuse & Neglect* 2009;**33**(11):815-25 doi: <http://dx.doi.org/10.1016/j.chiabu.2009.09.005>[published Online First: Epub Date]].
  52. Parker G, Roussos J, Hadzi-Pavlovic D, et al. The development of a refined measure of dysfunctional parenting and assessment of its relevance in patients with affective disorders. *Psychological Medicine* 1997;**27**(05):1193-203 doi: doi:10.1017/S003329179700545X[published Online First: Epub Date]].
  53. Lenhart A. *Teens, Social Media and Technology Overview 2015*. Washington, D.C.: Pew Research Center, 2015.
  54. Livingstone S, Haddon L, Gorzig A, et al. *Risks and safety on the internet: the perspective of European children: full findings and policy implications from the EU Kids Online survey of 9-16 year olds and their parents in 25 countries*. London: EU Kids Online Network, 2011.
  55. Marret MJ, Choo WY. *Use of ICT by Minors: Key Project Findings*. Kuala Lumpur: University of Malaya, 2014.
  56. Mascheroni G, Olafsson K. *Net Children Go Mobile: risks and opportunities*. Milan: Educatt, 2014.
  57. Mitchell KJ, Jones LM, Finkelhor D, et al. Understanding the decline in unwanted online sexual solicitations for U.S. youth 2000–2010: Findings from three Youth Internet Safety Surveys. *Child Abuse & Neglect* 2013;**37**(12):1225-36 doi: <http://dx.doi.org/10.1016/j.chiabu.2013.07.002>[published Online First: Epub Date]].
  58. Madden M, Lenhart A, Cortesi S, et al. *Teens, Social Media, and Privacy*. Washington, D.C.: Pew Research Center, 2013.
  59. Peter J, Valkenburg PM, Schouten AP. Characteristics and Motives of Adolescents Talking with Strangers on the Internet. *CyberPsychology & Behavior* 2006;**9**(5):526-30 doi: 10.1089/cpb.2006.9.526[published Online First: Epub Date]].
  60. Liu C, Ang RP, Lwin MO. Cognitive, personality, and social factors associated with adolescents' online personal information disclosure. *Journal of Adolescence* 2013;**36**(4):629-38 doi: <http://dx.doi.org/10.1016/j.adolescence.2013.03.016>[published Online First: Epub Date]].
  61. Price M, Dalgliesh J. Cyberbullying: Experiences, impacts and coping strategies as described by Australian young people. *Youth Studies Australia* 2010;**29**(2):51-59

- 1  
2  
3 62. Choo W-Y, Dunne MP, Marret MJ, et al. Victimization Experiences of Adolescents in Malaysia.  
4 Journal of Adolescent Health 2011;**49**(6):627-34 doi:  
5 <http://dx.doi.org/10.1016/j.jadohealth.2011.04.020>[published Online First: Epub Date] | .  
6  
7 63. Marret MJ, Choo WY. Victimization After Meeting With Online Acquaintances: A Cross-Sectional  
8 Survey of Adolescents in Malaysia. Journal Of Interpersonal Violence 2016 doi:  
9 10.1177/0886260515625502[published Online First: Epub Date] | .  
10  
11 64. Liao AK, Khoo A, Ang PH. Factors influencing adolescents engagement in risky Internet behavior.  
12 Cyberpsychology & Behavior 2005;**8**(6):513-20  
13  
14 65. Badaly D, Kelly BM, Schwartz D, et al. Longitudinal associations of electronic aggression and  
15 victimization with social standing during adolescence. Journal of Youth and Adolescence  
16 2013;**42**(6):891-904 doi: 10.1007/s10964-012-9787-2[published Online First: Epub Date] | .  
17  
18 66. Schneider SK, O'Donnell L, Stueve A, et al. Cyberbullying, School Bullying, and Psychological Distress:  
19 A Regional Census of High School Students. American Journal of Public Health 2012;**102**(1):171-  
20 77  
21  
22  
23  
24  
25  
26  
27  
28  
29  
30  
31  
32  
33  
34  
35  
36  
37  
38  
39  
40  
41  
42  
43  
44  
45  
46  
47  
48  
49  
50  
51  
52  
53  
54  
55  
56  
57  
58  
59  
60

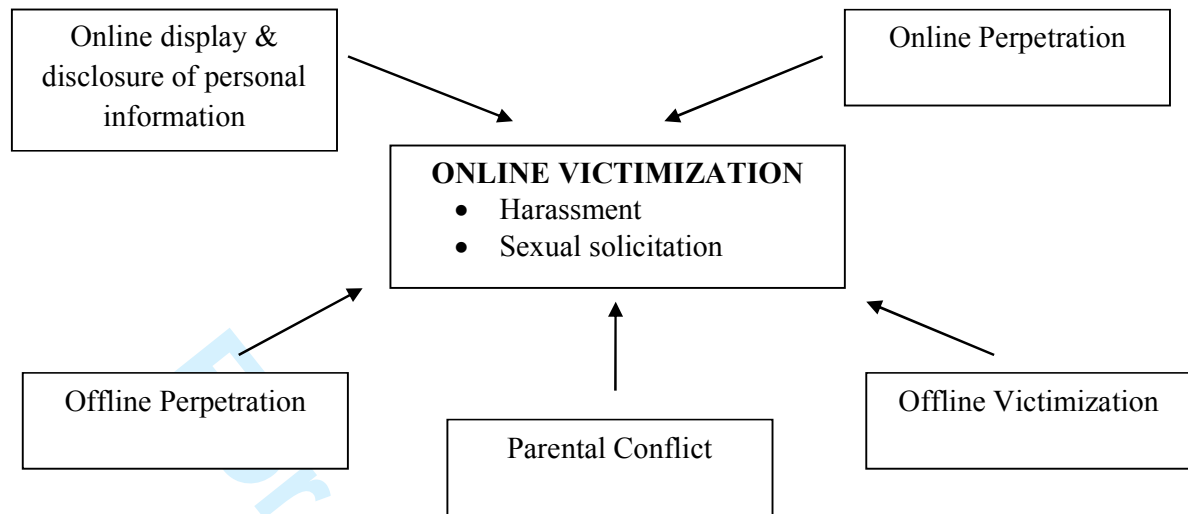

Figure 1: Theoretical framework of factors which may affect exposure to online victimization

1  
2  
3  
4  
5  
6  
7  
8  
9  
10  
11  
12  
13  
14  
15  
16  
17  
18  
19  
20  
21  
22  
23  
24  
25  
26  
27  
28  
29  
30  
31  
32  
33  
34  
35  
36  
37  
38  
39  
40  
41  
42  
43  
44  
45  
46  
47  
48  
49  
50  
51  
52  
53  
54  
55  
56  
57  
58  
59  
60

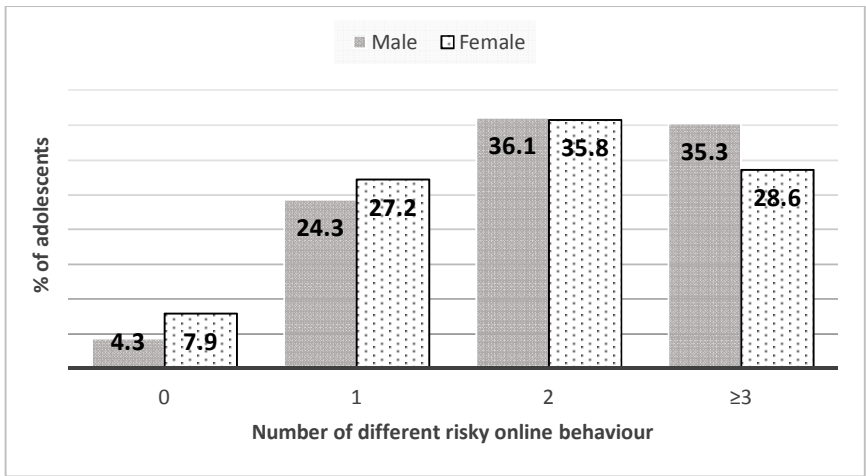

Figure 2: Cumulative risky online behaviour by gender

peer review only

## Details of questionnaire used in survey

The following items were included in the questionnaire:

***Socio-demographic information.*** Items included were age, gender, ethnicity, place of residence, parents' marital status and parents' education level.

***Use of social networking sites (SNS).*** Items included were the age of initiation of SNS use, motivation for use, most frequently used SNS, number of SNS profiles, frequency and duration of access to SNS, number of SNS contacts and motivations for use

***Privacy settings and disclosure of personal information on SNS.*** Items included were the use of privacy settings on their SNS profiles and about specific behaviors pertaining to public display of personal information on user profiles as well as the sharing of personal information and interaction with "SNS contacts". The term SNS contacts denoted individuals encountered solely through a SNS without a prior face-to-face introduction.

Posting of personal information was measured by display of any of the following data on a publicly accessible profile: real name, photograph, residential address, name of school, telephone number

Disclosure of personal information was deemed to occur if any of the following data were sent to an SNS contact: real name, photograph, address, name of school, telephone number

Posting of revealing images was deemed to occur if an image (either a still photograph or video) of the respondent clad only in a swimsuit or undergarments was displayed on a publicly accessible SNS profile

1  
2  
3 Interaction with strangers was deemed to occur if respondents accepted “friend  
4 requests” from individuals unknown to them or communicated with such  
5 individuals through chat, replying of messages or posting comments on their  
6 wall  
7  
8  
9  
10

11  
12 ***Victimization on SNS.*** The following items assessed victimization within the previous 12  
13 months under categories of harassment and unwanted sexual solicitation. The frequency of  
14 these experiences was indicated on a 6-point scale which ranged from “daily or almost daily”  
15 to “never”. To facilitate statistical analysis, the responses were grouped under three  
16 categories: (1) frequent (experiences occurred at least a few times a year) (2) infrequent  
17 (experiences occurred once in the past 12 months) (3) never  
18  
19  
20  
21  
22  
23  
24

25  
26  
27 Harassment was measured through 3 questions adapted from the Growing Up  
28 with Media Survey (whether someone made rude or mean comments, spread  
29 rumours whether they were true or not, made threatening or aggressive  
30 remarks [1]  
31  
32  
33  
34  
35  
36  
37

38 Unwanted sexual solicitation was measured with 3 questions adapted from the  
39 Youth Internet Safety Survey (whether someone had forced sexual talk when  
40 they were unwilling, whether someone had asked for sexual information about  
41 themselves which they were unwilling to share or if someone had asked them  
42 to do something sexual against their will) [2].  
43  
44  
45  
46  
47  
48  
49  
50  
51  
52  
53  
54  
55  
56  
57  
58  
59  
60



1  
2  
3 Previous studies have shown high reliability for both instruments. The internal  
4 reliability estimated with Cronbach's Alpha was .93 for Internet sexual solicitation  
5 victimization and 0.79 for Internet harassment victimization [1 3 4].  
6  
7  
8  
9

10  
11  
12 ***Perpetration on SNS.*** The following items assessed self-reported online perpetration within  
13 the previous 12 months under categories of harassment and unwanted sexual solicitation. The  
14 frequency of these actions was indicated on a 6-point scale which ranged from "daily or  
15 almost daily" to "never". To facilitate statistical analysis, the responses were grouped under  
16 three categories: (1) frequent (respondents did this at least a few times a year) (2) infrequent  
17 (respondents did this once in the past 12 months) (3) never.  
18  
19  
20  
21  
22  
23  
24  
25  
26

27 Perpetration of harassment was measured with three questions from the  
28 Growing Up with Media Survey (making rude or mean comments, spreading  
29 rumours about someone whether they were true or not, directing threatening or  
30 aggressive comments towards others on SNS) [1].  
31  
32  
33  
34  
35

36 Perpetration of unwanted sexual solicitation was measured with three  
37 questions adapted from the Youth Internet Safety Survey (forcing others to  
38 engage in sexual talk, asking for sexual information or asking another to do  
39 something sexual when they were unwilling) [1].  
40  
41  
42  
43  
44  
45  
46

47 The internal reliability for the measures was estimated with Cronbach's Alpha:  
48 Perpetration of harassment (Cronbach .82); and Perpetration of unwanted sexual  
49 solicitation (Cronbach .93) [1].  
50  
51  
52  
53  
54  
55  
56  
57  
58  
59  
60

1  
2  
3 **Experiences of offline victimization.** Lifetime experiences of offline victimization were  
4  
5 assessed using the validated ISPCAN Child Abuse Screening tool for young adults Version  
6  
7 ICAST-R with 5 stem questions each assessing three domains of offline victimization (sexual  
8  
9 abuse, physical abuse or psychological abuse). For each stem question, the response options  
10  
11 were: (1) yes; (2) no and (3) cannot remember. For each positive response, follow-up  
12  
13 questions enquired about the frequency of maltreatment experiences and the category of the  
14  
15 perpetrator. A positive response to at least one stem question denoted victimization in that  
16  
17 particular domain. A summary index indicating the number of categories of victimization was  
18  
19 created ranging from 0 (none) to 3 (all three types). Previous studies have shown moderate to  
20  
21 high reliability [5].  
22  
23  
24  
25

26 **Offline bullying.** Lifetime perpetration of offline bullying was assessed using 4 stem  
27  
28 questions to measure three domains (1) psychological (not allowing a peer to join in a group  
29  
30 out of anger or hostility, spreading rumours about someone whether they were untrue or not)  
31  
32 (2) physical (pushing, beating or slapping a peer) (3) sexual (kissing or touching a peer  
33  
34 sexually when they did not consent). For each item, respondents were asked the frequency of  
35  
36 these actions on a 6-point scale from “daily or almost daily” to “never” [1]. A summary index  
37  
38 of the number of types of perpetration was created ranging from 0 (none) to 3 (all three types).  
39  
40  
41  
42

43 **Parental conflict.** A validated version of the Measure of Parenting Style (MOPS) was used to  
44  
45 assess parental conflict levels with 15 core items assessing Parental Indifference (6 items),  
46  
47 Parental Over-Control (4 items), and Parental Abuse (5 items). Responses were scored on a  
48  
49 4- point Likert type scale as follows: 0 = not true at all; 1 = slightly true; 2 = moderately true;  
50  
51 3 = extremely true. A total score was derived from summation of scores for all the items with  
52  
53 higher scores indicating greater levels of parental conflict. The instrument has shown  
54  
55 moderate to high reliability and validity. Previous studies with Cronbach's alphas ranging  
56  
57  
58  
59  
60

1  
2  
3 from .76 to .93 suggest that the measures are within acceptable internal consistency while  
4  
5 test-retest coefficients for the subscale ranged from 0.74 to 0.94, indicating high to moderate  
6  
7 consistency [6].  
8  
9  
10  
11  
12  
13  
14  
15  
16  
17

- 18 1. Ybarra ML, Espelage DL, Mitchell KJ. The Co-occurrence of Internet Harassment and Unwanted  
19 Sexual Solicitation Victimization and Perpetration: Associations with Psychosocial Indicators.  
20 Journal of Adolescent Health 2007;**41**(6, Supplement):S31-S41 doi:  
21 <http://dx.doi.org/10.1016/j.jadohealth.2007.09.010>[published Online First: Epub Date]].  
22
- 23 2. Ybarra ML, Mitchell KJ, Finkelhor D, et al. Internet prevention messages: Targeting the right online  
24 behaviors. Archives of Pediatrics & Adolescent Medicine 2007;**161**(2):138
- 25 3. Finkelhor D, Mitchell K, Wolak J. Online Victimization of Youth: Five Years Later. 2007
- 26 4. Wolak J, Mitchell K, Finkelhor D. Online Victimization of Youth: Five Years Later. Virginia: National  
27 Center for Missing and Exploited Children, 2006.
- 28 5. Dunne MP, Zolotor AJ, Runyan DK, et al. ISPCAN child abuse screening tools retrospective version  
29 (ICAST-R): Delphi study and field testing in seven countries. Child abuse & neglect  
30 2009;**33**(11):815-25
- 31 6. Parker G, Roussos J, Hadzi-Pavlovic D, et al. The development of a refined measure of  
32 dysfunctional parenting and assessment of its relevance in patients with affective disorders.  
33 Psychological Medicine 1997;**27**(05):1193-203 doi:  
34 doi:10.1017/S003329179700545X[published Online First: Epub Date]].  
35  
36  
37  
38  
39  
40  
41  
42  
43  
44  
45  
46  
47  
48  
49  
50  
51  
52  
53  
54  
55  
56  
57  
58  
59  
60

STROBE 2007 (v4) Statement—Checklist of items that should be included in reports of *cross-sectional studies*

| Section/Topic             | Item # | Recommendation                                                                                                                                                                       | Reported on page #     |
|---------------------------|--------|--------------------------------------------------------------------------------------------------------------------------------------------------------------------------------------|------------------------|
| Title and abstract        | 1      | (a) Indicate the study’s design with a commonly used term in the title or the abstract                                                                                               | Title & abstract 1-2   |
|                           |        | (b) Provide in the abstract an informative and balanced summary of what was done and what was found                                                                                  | Title & abstract 2     |
| <b>Introduction</b>       |        |                                                                                                                                                                                      |                        |
| Background/rationale      | 2      | Explain the scientific background and rationale for the investigation being reported                                                                                                 | Introduction 4-6       |
| Objectives                | 3      | State specific objectives, including any prespecified hypotheses                                                                                                                     | Introduction 6-7       |
| <b>Methods</b>            |        |                                                                                                                                                                                      |                        |
| Study design              | 4      | Present key elements of study design early in the paper                                                                                                                              | Methods 7-8            |
| Setting                   | 5      | Describe the setting, locations, and relevant dates, including periods of recruitment, exposure, follow-up, and data collection                                                      | Methods 7-8            |
| Participants              | 6      | (a) Give the eligibility criteria, and the sources and methods of selection of participants                                                                                          | Methods 7-8            |
| Variables                 | 7      | Clearly define all outcomes, exposures, predictors, potential confounders, and effect modifiers. Give diagnostic criteria, if applicable                                             | Methods 7-9            |
| Data sources/ measurement | 8*     | For each variable of interest, give sources of data and details of methods of assessment (measurement). Describe comparability of assessment methods if there is more than one group | Methods 7-9            |
| Bias                      | 9      | Describe any efforts to address potential sources of bias                                                                                                                            | Procedure 7-8          |
| Study size                | 10     | Explain how the study size was arrived at                                                                                                                                            | Sample 7               |
| Quantitative variables    | 11     | Explain how quantitative variables were handled in the analyses. If applicable, describe which groupings were chosen and why                                                         | Statistical analysis 9 |
| Statistical methods       | 12     | (a) Describe all statistical methods, including those used to control for confounding                                                                                                | Statistical analysis 9 |
|                           |        | (b) Describe any methods used to examine subgroups and interactions                                                                                                                  | Statistical analysis 9 |
|                           |        | (c) Explain how missing data were addressed                                                                                                                                          | Statistical analysis 9 |
|                           |        | (d) If applicable, describe analytical methods taking account of sampling strategy                                                                                                   | Not applicable         |
|                           |        | (e) Describe any sensitivity analyses                                                                                                                                                | Not applicable         |
| <b>Results</b>            |        |                                                                                                                                                                                      |                        |

|                          |     |                                                                                                                                                                                                              |                            |
|--------------------------|-----|--------------------------------------------------------------------------------------------------------------------------------------------------------------------------------------------------------------|----------------------------|
| Participants             | 13* | (a) Report numbers of individuals at each stage of study—eg numbers potentially eligible, examined for eligibility, confirmed eligible, included in the study, completing follow-up, and analysed            | Statistical analysis 7 & 9 |
|                          |     | (b) Give reasons for non-participation at each stage                                                                                                                                                         | Sample 7                   |
|                          |     | (c) Consider use of a flow diagram                                                                                                                                                                           | Explained in text 7& 9     |
| Descriptive data         | 14* | (a) Give characteristics of study participants (eg demographic, clinical, social) and information on exposures and potential confounders                                                                     | Results 9 - 17             |
|                          |     | (b) Indicate number of participants with missing data for each variable of interest                                                                                                                          | Statistical analysis 9     |
| Outcome data             | 15* | Report numbers of outcome events or summary measures                                                                                                                                                         | Results 9 - 17             |
| Main results             | 16  | (a) Give unadjusted estimates and, if applicable, confounder-adjusted estimates and their precision (eg, 95% confidence interval). Make clear which confounders were adjusted for and why they were included | Results 9-17               |
|                          |     | (b) Report category boundaries when continuous variables were categorized                                                                                                                                    | Results 9 - 17             |
|                          |     | (c) If relevant, consider translating estimates of relative risk into absolute risk for a meaningful time period                                                                                             | Not relevant               |
| Other analyses           | 17  | Report other analyses done—eg analyses of subgroups and interactions, and sensitivity analyses                                                                                                               | Results 9 -17              |
| <b>Discussion</b>        |     |                                                                                                                                                                                                              |                            |
| Key results              | 18  | Summarise key results with reference to study objectives                                                                                                                                                     | Discussion 17 - 21         |
| Limitations              | 19  | Discuss limitations of the study, taking into account sources of potential bias or imprecision. Discuss both direction and magnitude of any potential bias                                                   | Discussion 17 -21          |
| Interpretation           | 20  | Give a cautious overall interpretation of results considering objectives, limitations, multiplicity of analyses, results from similar studies, and other relevant evidence                                   | Discussion 17 -21          |
| Generalisability         | 21  | Discuss the generalisability (external validity) of the study results                                                                                                                                        | Discussion 17 -21          |
| <b>Other information</b> |     |                                                                                                                                                                                                              |                            |
| Funding                  | 22  | Give the source of funding and the role of the funders for the present study and, if applicable, for the original study on which the present article is based                                                | Funding 23                 |

\*Give information separately for cases and controls in case-control studies and, if applicable, for exposed and unexposed groups in cohort and cross-sectional studies.

**Note:** An Explanation and Elaboration article discusses each checklist item and gives methodological background and published examples of transparent reporting. The STROBE checklist is best used in conjunction with this article (freely available on the Web sites of PLoS Medicine at <http://www.plosmedicine.org/>, Annals of Internal Medicine at <http://www.annals.org/>, and Epidemiology at <http://www.epidem.com/>). Information on the STROBE Initiative is available at [www.strobe-statement.org](http://www.strobe-statement.org).

# BMJ Open

## Factors associated with online victimization among Malaysian adolescents who use social networking sites: a cross-sectional study

|                                 |                                                                                                                                             |
|---------------------------------|---------------------------------------------------------------------------------------------------------------------------------------------|
| Journal:                        | <i>BMJ Open</i>                                                                                                                             |
| Manuscript ID                   | bmjopen-2016-014959.R1                                                                                                                      |
| Article Type:                   | Research                                                                                                                                    |
| Date Submitted by the Author:   | 21-Mar-2017                                                                                                                                 |
| Complete List of Authors:       | Marret, Mary; University of Malaya Faculty of Medicine, Paediatrics<br>Choo, Wan Yuen; University of Malaya, Social and Preventive Medicine |
| <b>Primary Subject Heading</b>: | Paediatrics                                                                                                                                 |
| Secondary Subject Heading:      | Public health                                                                                                                               |
| Keywords:                       | Community child health < PAEDIATRICS, EPIDEMIOLOGY, Information technology < BIOTECHNOLOGY & BIOINFORMATICS                                 |
|                                 |                                                                                                                                             |

SCHOLARONE™  
Manuscripts

1  
2  
3 **Title** Factors associated with online victimization among Malaysian  
4 adolescents who use social networking sites: a cross-sectional  
5 study  
6  
7 **Corresponding author** Mary J Marret  
8 Department of Paediatrics  
9 University of Malaya  
10 Kuala Lumpur 50603  
11 Malaysia  
12 [marret@um.edu.my](mailto:marret@um.edu.my)  
13 Tel: 603 79492065  
14 Fax: 603 79494704  
15  
16  
17 **Co-author** Wan-Yuen Choo  
18 Department of Social and Preventive Medicine  
19 University of Malaya  
20 Kuala Lumpur 50603  
21 Malaysia  
22  
23 **Keywords** Internet, interpersonal relations, crime victims, adolescent,  
24 bullying  
25  
26  
27 **Word Count** 7, 980  
28  
29  
30  
31  
32  
33  
34  
35  
36  
37  
38  
39  
40  
41  
42  
43  
44  
45  
46  
47  
48  
49  
50  
51  
52  
53  
54  
55  
56  
57  
58  
59  
60

**Abstract****Objective:**

To determine the prevalence of online interpersonal victimization and its association with patterns of SNS use, offline victimization, offline perpetration and parental conflict among Malaysian adolescents using social networking sites (SNS).

**Methods:**

A cross-sectional study of students from randomly selected public secondary schools in the state of Negeri Sembilan was conducted using an anonymous self-administered questionnaire. The questionnaire examined patterns of SNS use and included measures of online victimization, online perpetration, offline victimization and parental conflict. A response rate of 91% from a total of 1,634 yielded a sample of 1,487 students between 15 and 16 years of age.

**Results:**

Ninety-two percent of respondents had used at least one SNS. More than half of SNS users (52.2%) reported experiences of online victimization over the past 12 months. Males were significantly more likely to experience online harassment compared to females (52.2% vs 43.3%,  $p < 0.001$ ). There were no significant gender differences in experiences of unwanted sexual solicitation. Adolescents who engaged in perpetration behaviours online had almost 6 times higher odds of reporting frequent online victimization compared with online behaviours involving personal disclosure. There was a significant dose-response relationship between engagement in multiple types of online behaviour and the risk of frequent online victimization. Both online and offline perpetration were associated with an increased risk of victimization. Those who were victimized offline or experienced parental conflict were twice as likely to report online victimization.

**Conclusion:**

Interventions to prevent online electronic aggression should target perpetration behaviour both online and offline. Youth should be equipped with skills in communication and decision-making in relationships that can be applied across a spectrum of contexts both online and offline.



**Strengths and limitations of this study**

- Large population-based study
- High response rate
- Examines association of online victimization with behaviour and experiences both online and offline
- Results are based on self-reporting which is subject to distortions from errors in recollection and social-desirability bias
- Cross-section design limits inferences regarding the direction of the associations found

For peer review only

## INTRODUCTION

Electronic aggression enacted through a range of behaviour perpetrated via computers, cellphones and other electronic devices has been found to be a common experience among young persons [1-3]. Prevalence estimates of victimization in the form of harassment range from 5.5% to 72%. The wide variability in prevalence has been attributed in part to the operational definitions applied, as well as the time frame of assessment. It has been observed that studies using broad definitions and measurement of lifetime experiences have reported higher levels of prevalence. More conservative estimates have emerged from studies with narrow definitions and the limiting of measurements to recent experiences [4-13]. Varying levels of unwelcomed sexual aggression have been reported across Europe ranging from 1 in 10 (Germany, Iceland, Portugal) to 1 in 2 (Poland) [14]. A review of three U.S. surveys reported declining trends from 1 in 5 youth Internet users to 9% over a decade [7].

The relationship between online interpersonal harassment and aggressive or sexually exploitative offline encounters as well as longer term mental health outcomes makes this an important public health concern [5 14-16]. Exposure to electronic aggression among youth has been associated with emotional disturbances, negative mental health outcomes and a range of internalizing and externalizing behaviours as well as substance abuse problems [17].

One of the challenges to research in this field is the absence of consensus on a conceptual definition [12 18]. A number of terms with overlapping meanings such as electronic bullying, cyberbullying, cyber-aggression, internet bullying, internet harassment, online harassment or technology-based victimization have been used to describe this form of violence [12 18 19].

Electronic aggression may be enacted through a range of behaviours. This includes the spreading of harmful lies, directing rude or threatening comments against individuals,

1  
2  
3 spreading of embarrassing rumours and posting of digital photographs or videos intended to  
4 humiliate others. These acts may originate from known or anonymous sources [20]. The term  
5 “cyberbullying” is usually applied to online aggression perpetrated by peers that overlaps  
6 with traditional bullying [21]. The term “online harassment” encompasses a broader range of  
7 offences, committed by known or anonymous sources of any age, which occur in a setting  
8 outside adult supervision and scrutiny [21]. Electronic aggression of a sexual nature directed  
9 towards an unwilling subject has been termed “unwanted sexual solicitation”. This can take  
10 the form of invitations to talk about sex, do something sexual or share personal sexual  
11 information that may be diverse in nature and origin [22]. Perpetrators of this type of  
12 behaviour are usually male [23]. Such acts may originate from troubled youth with a history  
13 of other behavioural problems or adult sexual predators engaged in deliberate manipulation  
14 and seduction of minors [22 24 25]. The latter are not limited to strangers encountered online.  
15 They may include adults within the family and social circle [25]. Distinctive characteristics of  
16 electronic aggression include greater permanence of content, visibility to a wider audience  
17 and repeat victimization without active involvement of the perpetrator [26-28]. The  
18 possibility of attacking remotely at any time of the day or night with multiple media makes  
19 the victimization experience more intrusive and difficult to escape [3 29]. Anonymity and  
20 blinding of perpetrators to their victim’s reactions may reduce inhibitions, foster  
21 deindividuation, reduce accountability and promote antinormative behaviours [20].

22  
23  
24  
25  
26  
27  
28  
29  
30  
31  
32  
33  
34  
35  
36  
37  
38  
39  
40  
41  
42  
43  
44  
45  
46  
47 With its diversity in form, expression, participants and underlying motivations, no robust  
48 theoretical model has been identified which can adequately explain the phenomenon of  
49 electronic aggression [30]. A number of contextual factors associated with its occurrence  
50 among youth have been studied to identify opportunities for intervention and prevention.  
51  
52  
53  
54  
55  
56  
57  
58  
59  
60

1  
2  
3 They include demographic characteristics of victims, patterns of Internet use, online  
4  
5 behaviour and experiences of offline victimization.  
6  
7

8  
9  
10 From a developmental perspective, the amount of time spent online as well as the degree of  
11  
12 social interaction online may vary with age. Forms and expressions of aggression may also  
13  
14 evolve with changing levels of maturity. These differences may play a part in the level of  
15  
16 online victimization experienced by different age groups [30]. An increasing trend of  
17  
18 cyberbullying between the ages of 11 and 15 years that peaks in middle school and  
19  
20 subsequently declines in high school has been reported [1 31-33]. However not all studies  
21  
22 have found a consistent relationship between cyberbullying and age [8].  
23  
24  
25  
26

27 Examination of online victimization in relation to gender has yielded a mixed picture. A  
28  
29 preponderance of female victimization has been reported in some studies from North  
30  
31 America and Europe [2 14 17 32 34-37]. This may reflect targeting of victims based on  
32  
33 gender. This could also be due to the involvement of more girls in indirect bullying, as both  
34  
35 bullies and victims [1 30]. Data from the UKCGO and SAFT surveys conducted in Europe  
36  
37 found variations across countries and age groups. Higher levels of victimization were found  
38  
39 among older teenage girls in UK and Norway, and among boys aged 9 to 12 years in Ireland  
40  
41 [9]. A few studies have not found gender-based victimization patterns [31 38 39]. Others,  
42  
43 mainly from Asia, have reported a preponderance of males in combined roles of perpetrators  
44  
45 and victims [11 15 40]. One of these studies from mainland China attributed this gender  
46  
47 difference to patterns of upbringing. In traditional Chinese culture, girls are expected to be  
48  
49 gentle, kind and polite whereas boys are encouraged to be more assertive [11].  
50  
51  
52  
53  
54  
55  
56  
57  
58  
59  
60

1  
2  
3 Patterns of Internet use have been explored in relation to the routine activities theory [41]  
4  
5 which predicts higher levels of victimization among those with greater exposure to risk  
6  
7 through their activities [42]. Support for this theory has been found in the association of  
8  
9 online interpersonal victimization with increased time spent online [8 22] and increased  
10  
11 digital competence [14].  
12  
13

14  
15  
16 With regard to online behaviour, disclosure of personal information to online acquaintances  
17  
18 [15 43 44] and harassing others online [22 44] have been found to be associated with  
19  
20 increased risks of online interpersonal victimization. Cumulative engagement in multiple  
21  
22 activities individually identified as risky has been associated with escalation of the risk of  
23  
24 online interpersonal victimization [44]. There is also evidence linking engagement in risky  
25  
26 online behavior and online interpersonal victimization with offline experiences and  
27  
28 behaviour. These include victimization in the form of child abuse and bullying, engagement  
29  
30 in offline physical relational and sexual aggression as well as conflicts with caregivers [10 16  
31  
32 21 22 45 46]. These offline experiences have existed prior to the advent of new  
33  
34 communication technologies. It has been postulated that the integration of the Internet into  
35  
36 the lives of youth has resulted in the extension of problems encountered offline to online  
37  
38 interactions. Consequently, a broad view which incorporates electronic victimization within  
39  
40 the victimization spectrum has been proposed by some researchers in preference to  
41  
42 considering traditional and electronic victimization as separate entities [13 47]. This  
43  
44 perspective would be valuable in seeking strategies to reduce the prevalence of various forms  
45  
46 of youth victimization as a whole [13]. Current research suggests that the determinants of  
47  
48 exposure to online interpersonal victimization and consequent harm are a composite of  
49  
50 general factors that may interact with specific factors which enhance individual vulnerability.  
51  
52  
53  
54  
55  
56 General factors include adolescent-related interests in social communication and sexual  
57  
58  
59  
60

1  
2  
3 exploration, gender, as well as cultural norms [48 49]. Specific vulnerabilities may be related  
4  
5 to past or concurrent offline victimization, difficult family relationships, alternative sexual  
6  
7 orientation, problem behavior, substance abuse and accompanying psycho-social difficulties  
8  
9 which could influence the propensity to engage in problematic interactions online [16 43 49].  
10

11  
12  
13  
14 The objective of this study was to determine the prevalence of online interpersonal  
15  
16 victimization among Malaysian adolescents using social networking sites (SNS) and its  
17  
18 association with patterns of SNS use, offline victimization, offline perpetration as well as  
19  
20 parental conflict. There is a lack of research to explore risks encountered by youth using  
21  
22 digital communication from middle income Asian countries such as Malaysia. Over the past  
23  
24 decade, there has been rapid expansion in the Internet penetration rate and the use of mobile  
25  
26 communication devices throughout Malaysia. A programme called CyberSAFE in schools  
27  
28 was launched by the Malaysian government in response to emerging safety threats [50].  
29  
30

31  
32 Through a partnership between government agencies and the telecommunication industry, a  
33  
34 series of training workshops on cybersecurity have been conducted for teachers and students  
35  
36 across the country [51 52]. Concomitant school surveys within this programme have found  
37  
38 that electronic aggression is a common problem, especially among older adolescents [50 51].  
39

40  
41 Almost half of those surveyed were found to practice low levels of online safety. Another  
42  
43 finding was that awareness of online dangers did not translate into positive action [51].  
44

45  
46 Building on these preliminary findings, this study explores factors which may contribute to  
47  
48 victimization. This would provide an evidence base for designing interventions to reduce  
49  
50 online victimization. The study findings would also be relevant in the formulation of policies  
51  
52 and legislation to protect young persons.  
53  
54  
55  
56  
57  
58  
59  
60

1  
2  
3 Social networking sites incorporate features which facilitate communication and the  
4  
5 development of social relationships. These include (a) the integration of various levels of  
6  
7 private and public communication (b) accessibility to a network of contacts (c) the ability to  
8  
9 display and exchange personal information in textual form as well as digital images [53 54].  
10  
11 However the same features simultaneously generate avenues for victimization [14 42 55].  
12  
13 The SNS platform was selected to study electronic aggression among youth based on these  
14  
15 features and its popularity among adolescents as a communication tool [50 53 54 56].  
16  
17  
18  
19

20  
21 Based on the aforementioned research, factors which could affect exposure to online  
22  
23 interpersonal victimization were organized into a conceptual framework (Figure 1). The focus  
24  
25 of this study was on variables associated with greater intensity of victimization as measured  
26  
27 by frequency.  
28

29  
30 Older adolescents were selected for this study. This age group was identified to be vulnerable  
31  
32 by the Malaysian CyberSAFE programme [50 51].  
33  
34  
35

36 The following research questions were addressed:

- 37  
38 1. What is the prevalence of SNS usage and specific online behaviours among  
39  
40 adolescents?
- 41  
42 2. What is the prevalence of online or offline victimization and perpetration experienced  
43  
44 by adolescents using SNS?
- 45  
46 3. Is there an association between frequent online victimization and online behaviour?
- 47  
48 4. Is there an association between frequent online victimization and experiences of  
49  
50 offline victimization, online perpetration, offline perpetration and parental conflict?  
51  
52  
53  
54

## 55 56 **METHOD** 57 58 59 60

## Sample

The study was conducted with students from public secondary schools in the state of Negri Sembilan. The multi-ethnic composition within this state resembles that of the national population. Twelve schools (7 urban, 5 rural) were randomly selected from a list of 117 schools. The sample was drawn from Form 4 students aged between 15 and 16 years of age. For each selected school, 4-5 classes of Form 4 students were randomly selected. Sample size was calculated based on previous studies of online victimization reporting prevalence rates ranging from 5% to 55% [9 22 57]. An upper estimate that 55% of students would be likely to experience at least one type of victimization was used. We assumed a confidence interval of 95% and precision of 2.5%, inflated for missing data of 30%. These assumptions yielded a sample size of approximately 1560.

## Procedure

Students completed an anonymous self-administered paper and pencil questionnaire. Participation was voluntary with assurances that confidentiality would be maintained and responses would not influence school grades. The surveys were conducted in classes in a single session. Questionnaires were administered without the presence of class teachers. These procedures were necessary to increase response and disclosure. At the end of every survey session, all students were provided with an information sheet containing a list of contacts of available support services and helplines.

## Instrument

Details of the questionnaire are provided in a supplementary file. The questionnaire contained items regarding socio-demographic characteristics and details regarding the



1  
2  
3 use of social networking sites (SNS). A number of items measured risky online  
4  
5 behavior relating to the public display of personal information, interaction with  
6  
7 individuals encountered online without a prior offline introduction and disclosure of  
8  
9 personal information to such individuals. Online victimization as well as online  
10  
11 perpetration in the form of harassment and unwanted sexual solicitation in the  
12  
13 previous 12 months was measured with questions adapted from the Growing Up with  
14  
15 Media Survey and the Youth Internet Safety Survey [22 44]. Lifetime experiences of  
16  
17 offline victimization were assessed using the validated ISPCAN Child Abuse  
18  
19 Screening tool for young adults [58]. Offline perpetration was measured in 3 domains  
20  
21 (psychological, physical, sexual) with 4 stem questions from the Growing Up with  
22  
23 Media Survey [22]. A validated version of the Measure of Parenting Style was used to  
24  
25 assess parental conflict levels [59].  
26  
27  
28  
29  
30  
31

### 32 **Ethical considerations**

33  
34 Institutional approval was granted by the Medical Ethics Committee of the University  
35  
36 of Malaya Medical Centre (MEC 890.97). Permission for data collection was obtained  
37  
38 from the Ministry of Education and the state Department of Education of Negri  
39  
40 Sembilan. Informed consent was obtained from school authorities and parents.  
41  
42 Students gave their assent to participation.  
43  
44  
45  
46

### 47 **Statistical Analysis**

48  
49 Data was analyzed using Statistical Package for Social Sciences (SPSS) windows  
50  
51 version 22.0. Descriptive statistics of the type and frequency of specific risky online  
52  
53 behaviours, victimization and perpetration experiences was reported in proportions.  
54  
55 Subgroup analysis focusing on gender differences of these behaviours and  
56  
57  
58  
59  
60

1  
2  
3 experiences were also examined and reported. Missing data for each variable of  
4  
5 interest was less than 5% of the cases, and listwise deletion analysis was conducted  
6  
7 for complete cases. Multiple logistic regression analysis was used to estimate the odds  
8  
9 of reporting frequent online victimization among SNS users. The odds of frequent  
10  
11 online victimization were estimated for specific online behaviour, types of online  
12  
13 behaviour and engagement in multiple forms of online behaviour. The odds were  
14  
15 adjusted for demographic and SNS use characteristics. Next, odds ratios were  
16  
17 estimated to examine the association between offline victimization, parental conflict  
18  
19 as well as online perpetration with frequent online victimization by further adjusting  
20  
21 for the total number of online behaviours.  
22  
23  
24  
25  
26

## 27 **RESULTS**

### 28 **Socio-demographic characteristics**

29  
30 The response rate from a total of 1,634 students was 91% after eliminating 3 refusals  
31  
32 and 144 incomplete responses. The 1,487 respondents were aged between 15 to 16  
33  
34 years of age, of which 53.9% were female. They comprised predominantly Malay  
35  
36 (69.6%) followed by 16.7% Indian, 13.6% Chinese and 0.2% other ethnic groups.  
37  
38 Approximately 90% were living with both of their parents. Seventy percent of their  
39  
40 parents had completed at least a secondary school education. As there were no  
41  
42 significant differences between data from urban and rural schools, results from both  
43  
44 groups of schools were merged and analysed together.  
45  
46  
47  
48  
49  
50

### 51 **Prevalence of SNS usage**

52  
53 Ninety-two percent of respondents had used at least one social networking site (SNS).  
54  
55 The rest of the analysis was based on this subset denoted as “SNS users”. More than a  
56  
57  
58  
59  
60

1  
2  
3 third of SNS users started at the age of 12 years or younger, below the recommended  
4 age for SNS use. The most commonly used SNS was Facebook. Approximately half  
5  
6 of the adolescents possessed more than one profile and 45.4% accessed their profiles  
7  
8 daily. Duration of weekly use ranged from 20 minutes to 100 hours with a median of  
9  
10 3 hours. Two-thirds had more than 300 “friends” or contacts in their profile, with a  
11  
12 third reporting more than a 1000 contacts. Communication and social interaction were  
13  
14 found to be the most important reasons for SNS use compared to other purposes such  
15  
16 as leisure, keeping up with peers and public participation. Half of the respondents  
17  
18 (50.2%) acknowledged using SNS to meet new people and make new friends. Three-  
19  
20 quarters (74.5%) had accepted requests to include unknown persons into the list of  
21  
22 contacts with no significant gender differences.  
23  
24  
25  
26  
27  
28

### 29 **Prevalence of Specific Risky Online Behaviour**

30  
31 The prevalence of different types of online behaviours involving personal information  
32  
33 disclosure, interaction with strangers and online perpetration is shown in Table 1. Of  
34  
35 these, the most commonly reported online behaviour was interacting with strangers  
36  
37 while the posting of revealing images was the least common. With the exception of  
38  
39 sending personal information to strangers, most of the listed behaviours including  
40  
41 online perpetration were found to be more common among males. Approximately one  
42  
43 in three had engaged in at least one of the 6 listed behaviours while nearly a third had  
44  
45 engaged in 3 or more (31.8%). There was a significant upward trend of engagement in  
46  
47 multiple risky online behaviours among males compared to females ( $p<0.001$ ). (See  
48  
49 Figure 2).  
50  
51  
52  
53  
54  
55

56 **Table 1 : Prevalence of specific risky online behaviors (N = 1364)**  
57  
58  
59  
60

| Specific online behaviour                               | Male<br>(N=646)<br>(%) | Female<br>(N=718)<br>(%) | Total<br>(N=1364)<br>(%) | <i>p</i> value   |
|---------------------------------------------------------|------------------------|--------------------------|--------------------------|------------------|
| Posting personal information on a public profile        | 36.1                   | 29.7                     | 32.7                     | <b>0.012</b>     |
| Sending personal information to a stranger <sup>1</sup> | 45.2                   | 47.5                     | 46.4                     | 0.397            |
| Posting revealing photographs or videos                 | 2.2                    | 0.8                      | 1.5                      | <b>&lt;0.001</b> |
| Interaction with stranger <sup>1</sup>                  | 89.9                   | 86.5                     | 88.1                     | 0.050            |
| Perpetration of harassment                              | 37.2                   | 27                       | 31.8                     | <b>&lt;0.001</b> |
| Perpetration of unwanted sexual solicitation            | 5.3                    | 0.4                      | 2.7                      | <b>&lt;0.001</b> |

*p* value based on Pearson's chi-square test comparing differences in risky online behaviours between genders

*p* value in bold significant at  $p < 0.05$

<sup>1</sup> "stranger" refers to a contact encountered solely through an online SNS without a prior face-to-face meeting

### Prevalence of Victimization

The prevalence of online victimization, online perpetration, offline victimization and offline perpetration by gender is shown in Table 2.

#### Online victimization

More than half of the respondents (52.2%) had experienced some form of online victimization. The prevalence of online harassment was higher than unwanted sexual solicitation. Males were significantly more likely to experience online harassment compared to females. Whilst females were more likely to report unwanted sexual solicitation, the gender difference was not statistically significant. Frequent online victimization was slightly more common among males than females.

#### Online perpetration

One in three respondents reported engaging in some form of perpetration online. Perpetration of online harassment or aggression was more common than unwanted

sexual solicitation. Males had a significantly higher prevalence of both types of behaviour and were more likely to be frequent perpetrators.

### Offline victimization

There was a high prevalence of offline victimization in general (60.3%) reported by the study population with about one-third of SNS users reporting experiences of multiple types of victimization. Physical victimization was the most prevalent, followed by psychological and sexual. There were no significant gender differences found among subtypes of victimization except for psychological victimization which was more prevalent among females.

### Offline perpetration

Offline perpetration was reported by 37.5% of the respondents. About a quarter of the respondents reported having perpetrated either psychological or physical aggression towards others. The prevalence of offline sexual perpetration was much lower, at around 3%, and was more commonly reported by males. About one in every 10 respondents had engaged in multiple types of perpetration.

**Table 2: Prevalence of victimization and perpetration experiences by types and gender**

| Type of Exposure                  | Male<br>(N=646)<br>% | Female<br>(N=718)<br>% | Total<br>(N=1364)<br>% | <i>p</i> value |
|-----------------------------------|----------------------|------------------------|------------------------|----------------|
| Online victimization              | 54.8                 | 49.9                   | 52.2                   | 0.068          |
| <i>Types*</i>                     |                      |                        |                        |                |
| Online harassment                 | 52.2                 | 43.3                   | 47.5                   | <0.001         |
| Sexual solicitation               | 17.2                 | 20.8                   | 19.1                   | 0.094          |
| <i>Frequency of victimization</i> |                      |                        |                        |                |
| Frequent victimization            | 19.3                 | 12.4                   | 15.7                   | <b>0.002</b>   |
| Infrequent victimization          | 35.4                 | 37.5                   | 36.5                   |                |

|                                                |             |             |             |                  |
|------------------------------------------------|-------------|-------------|-------------|------------------|
| No victimization                               | 45.2        | 50.1        | 47.8        |                  |
| <b>Online Perpetration</b>                     | <b>37.6</b> | <b>27.0</b> | <b>32.0</b> | <b>&lt;0.001</b> |
| <i>Types*</i>                                  |             |             |             |                  |
| Online harassment                              | 37.2        | 27.0        | 31.8        | <b>&lt;0.001</b> |
| Sexual solicitation                            | 5.3         | 0.4         | 2.7         | <b>&lt;0.001</b> |
| <i>Frequency of perpetration</i>               |             |             |             | <b>&lt;0.001</b> |
| Frequent perpetration                          | 14.1        | 6.8         | 10.3        |                  |
| Infrequent perpetration                        | 23.5        | 20.2        | 21.8        |                  |
| No perpetration                                | 62.4        | 73.0        | 68.0        |                  |
| <b>Offline Victimization</b>                   | <b>58.2</b> | <b>62.3</b> | <b>60.3</b> | <b>0.127</b>     |
| <i>Types*</i>                                  |             |             |             |                  |
| Physical                                       | 50.2        | 47.8        | 48.9        | 0.379            |
| Sexual                                         | 17.0        | 17.0        | 17.0        | 0.986            |
| Psychological                                  | 26.3        | 39.8        | 33.4        | <b>&lt;0.001</b> |
| <i>Multiple types of offline victimization</i> |             |             |             |                  |
| None                                           | 37.7        | 41.8        | 39.7        | 0.130            |
| 1                                              | 30.5        | 28.7        | 29.5        |                  |
| ≥2                                             | 27.8        | 33.5        | 30.8        |                  |
| <b>Offline Perpetration</b>                    | <b>39.3</b> | <b>35.8</b> | <b>37.5</b> | <b>0.179</b>     |
| <i>Types*</i>                                  |             |             |             |                  |
| Physical                                       | 25.9        | 19.1        | 22.3        | <b>0.003</b>     |
| Psychological                                  | 23.4        | 23.5        | 23.5        | 0.943            |
| Sexual                                         | 5.1         | 1.5         | 3.2         | <b>&lt;0.001</b> |
| <i>Multiple types of offline perpetration</i>  |             |             |             | <b>0.008</b>     |
| None                                           | 60.7        | 64.2        | 62.5        |                  |
| 1                                              | 25.9        | 27.7        | 26.8        |                  |
| ≥2                                             | 12.4        | 8.1         | 10.7        |                  |

\*Categories are not mutually exclusive

*p* value based on Pearson's chi-square test comparing victimization or perpetration experiences by gender.

### Association between risky online behaviour and online victimization

The association between frequent online victimization and online behaviour is summarized in Table 3. Results were adjusted for sociodemographic and SNS use characteristics. The posting of revealing photographs was the only behaviour involving personal disclosure which was associated with a higher risk of online

victimization. Adolescents who engaged in perpetration behaviours were 6 times more likely to report frequent online victimization, compared with online behaviours involving personal disclosure. There was a significant dose-response relationship between engagement in multiple types of online behaviour and the risk of frequent online victimization. Neither the length of time spent on SNS nor the number of people in the respondents' contact lists were found to be associated with frequent online victimization.

**Table 3. Association of online victimization with risky online behaviours**

| Characteristics                                  | Odds of Online Victimization                   |                   |                                      |                   |
|--------------------------------------------------|------------------------------------------------|-------------------|--------------------------------------|-------------------|
|                                                  | Adjusted for Socio-demographic Characteristics |                   | Adjusted for SNS Use Characteristics |                   |
|                                                  | AOR (95% CI)                                   | <i>p</i> value    | AOR (95% CI)                         | <i>p</i> value    |
| <b>Specific Online behaviour</b>                 |                                                |                   |                                      |                   |
| Posting personal information on a public profile | 1.1 (0.7-1.4)                                  | 0.913             | 1.1 (0.7-1.3)                        | 0.830             |
| Sending personal information to strangers        | 1.7 (1.3-2.4)                                  | 0.001             | 1.2 (0.9-1.7)                        | 0.309             |
| Interaction with strangers                       | 1.4 (0.8-2.4)                                  | 0.198             | 1.1(0.6-2.0)                         | 0.682             |
| Posting revealing pictures                       | <b>3.0 (1.2-7.5)</b>                           | <b>0.018</b>      | <b>3.5(1.4-8.9)</b>                  | <b>0.007</b>      |
| Perpetration of harassment                       | <b>6.1 (4.4-8.6)</b>                           | <b>&lt; 0.001</b> | <b>5.6 (4.0-7.9)</b>                 | <b>&lt;0.001</b>  |
| Perpetration of unwanted sexual solicitation     | <b>4.1 (1.9-8.5)</b>                           | <b>&lt; 0.001</b> | <b>2.2 (1.1-4.4)</b>                 | <b>0.030</b>      |
| <b>Types of online behaviour</b>                 |                                                |                   |                                      |                   |
| Personal disclosure behaviours                   | 1.7 (0.8-3.4)                                  | 0.157             | 1.3 (0.6-2.6)                        | 0.471             |
| Perpetration behaviours                          | <b>6.3 (4.5-8.4)</b>                           | <b>&lt; 0.001</b> | <b>6.2 (4.5-8.6)</b>                 | <b>&lt; 0.001</b> |
| <b>Multiple types of online behaviours</b>       |                                                |                   |                                      |                   |
| ≤1                                               | 1                                              |                   | 1                                    |                   |
| 2                                                | <b>2.2 (1.4-3.6)</b>                           | <b>0.001</b>      | <b>2.4 (1.5-3.8)</b>                 | <b>&lt;0.001</b>  |
| 3                                                | <b>4.1 (2.5-6.7)</b>                           | <b>&lt; 0.001</b> | <b>4.2 (2.6-6.7)</b>                 | <b>&lt; 0.001</b> |

|          |                |         |                |         |
|----------|----------------|---------|----------------|---------|
| $\geq 4$ | 5.9 (3.4-10.5) | < 0.001 | 6.4 (3.7-11.1) | < 0.001 |
|----------|----------------|---------|----------------|---------|

Abbreviations: AOR adjusted odds ratio; CI, confidence interval

Personal disclosure behaviours consist of posting and sending personal information, interacting with strangers and posting revealing pictures

Perpetration behaviours include adolescents perpetrating harassment and unwanted sexual solicitation

Odds ratio are adjusted for (1) socio-demographic characteristics (ethnicity, gender, geographic location, parent's relationship status and parent's education level) and (2) SNS use (frequency & age of SNS access)

### Correlates of Frequent Online Victimization

Both online and offline perpetration were found to be associated with an increased risk of online victimization when adjusted for sociodemographic and internet use characteristics. The observed relationship remained strongly significant after adjustment for total number of online behaviours (see Table 4). Specifically, adolescents who engaged in frequent online perpetration were 12 times more likely to report frequent online victimization. Similarly, an upward trend of frequent online victimization was seen among those who engaged in multiple types of perpetration.

While adolescents who were victimized in the offline world were twice more likely to report online victimization, the odds did not increase with exposure to multiple types of offline victimization. Respondents who experienced high levels of parental conflict were twice more likely to be harassed or victimized online.

**Table 4. Association between online victimization with offline and online correlates**

| Characteristics            | Odds of Online Victimization                               |         |                                            |         |
|----------------------------|------------------------------------------------------------|---------|--------------------------------------------|---------|
|                            | Model 1                                                    |         | Model 2                                    |         |
|                            | Adjusted for Socio-demographic and SNS Use Characteristics |         | Adjusted for Total No. of Online Behaviors |         |
|                            | AOR (95% CI)                                               | p value | AOR (95% CI)                               | p value |
| <b>Online Perpetration</b> |                                                            |         |                                            |         |
| None                       | 1                                                          | NA      | 1                                          | NA      |



|                                                |                  |        |                 |        |
|------------------------------------------------|------------------|--------|-----------------|--------|
| Infrequent                                     | 2.6 (1.8-4.0)    | <0.001 | 1.8 (1.5-2.0)   | <0.001 |
| Frequent                                       | 21.8 (13.8-34.5) | <0.001 | 12.5 (8.2-18.9) | <0.001 |
| <b>Offline Perpetration</b>                    |                  |        |                 |        |
| None                                           | 1                | NA     | 1               | NA     |
| Offline perpetration                           | 2.0 (1.5-2.8)    | <0.001 | 1.6 (1.2-2.2)   | <0.001 |
| <b>Multiple types of offline perpetration</b>  |                  |        |                 |        |
| 0                                              | 1                | NA     | 1               | NA     |
| 1                                              | 1.6 (1.1-2.3)    | 0.013  | 1.3 (0.9-1.8)   | 0.171  |
| 2                                              | 2.9 (1.8-4.7)    | <0.001 | 2.4 (1.5-3.7)   | <0.001 |
| 3                                              | 12.3 (3.0-50.2)  | <0.001 | 7.9 (2.3-27.2)  | 0.001  |
| <b>Offline Victimization</b>                   |                  |        |                 |        |
| None                                           | 1                | NA     | 1               | NA     |
| Offline victimization                          | 1.8 (1.3-2.6)    | <0.001 | 1.7 (1.2-2.3)   | 0.001  |
| <b>Multiple types of offline victimization</b> |                  |        |                 |        |
| 0                                              | 1                | NA     | 1               | NA     |
| 1                                              | 1.4 (0.9-2.1)    | 0.136  | 1.0 (0.7-1.6)   | 0.654  |
| 2                                              | 2.2 (1.4-3.4)    | <0.001 | 1.4 (0.9-2.1)   | 0.117  |
| 3                                              | 3.1 (1.8-5.5)    | <0.001 | 1.6 (0.9-2.7)   | 0.075  |
| <b>Parental Conflict</b>                       |                  |        |                 |        |
| Low                                            | 1                | NA     | 1               | NA     |
| Medium                                         | 1.5 (0.9-2.3)    | 0.067  | 1.6 (1.5-1.9)   | <0.001 |
| High                                           | 2.2(1.5-3.2)     | <0.001 | 1.7(1.2-2.51)   | 0.003  |

AOR, adjusted odds ratio; CI, confidence interval; NA, data not applicable

Model 1: Odds ratios were adjusted for sociodemographic (ethnicity, gender, geographic location, parent's relationship status and parent's education level) and SNS use characteristics (frequency of access and age of 1<sup>st</sup> access)

Model 2: Odds ratios were adjusted for total number of online behaviours (posting personal information on a public profile, posting revealing photographs or videos, sending personal information to strangers, interacting with strangers, perpetration of harassment and unwanted sexual solicitation), besides demographic and SNS use.

## DISCUSSION

The high prevalence of SNS users and reported motivation for use are consistent with studies in Europe and other local studies [54 56 60 61]. Initiation of SNS use at a young age mirrors findings in Europe where 27% of 9-10 year olds said they had a

1  
2  
3 SNS profile [62]. Knowledge of these demographic patterns should be applied in  
4  
5 initiatives to address the overall safety, well-being and development of youth [63].  
6  
7

8  
9  
10 Higher levels of interaction with unknown persons were found than what has been  
11  
12 previously reported in the U.S. [64] or locally [57]. This may be due to adolescents  
13  
14 maximizing avenues for social communication and sexual exploration away from  
15  
16 adult scrutiny, particularly within the context of a conservative Asian and  
17  
18 predominantly Muslim community. It could also be the consequence of boredom,  
19  
20 curiosity and social inhibitions in face-to-face encounters [65]. When such behaviour  
21  
22 is normative, a communication-based approach to education on safeguarding  
23  
24 individual privacy and security is more likely to be effective than a restrictive  
25  
26 approach [66].  
27  
28

29  
30  
31 The prevalence of online harassment in this study falls within the wide range of  
32  
33 existing prevalence estimates of 5.5% and 72% [4-11], confirming that the problem  
34  
35 extends to youth in this region and needs to be addressed. The odds of experiencing  
36  
37 harassment are marginally higher among youth who report online interaction with  
38  
39 strangers suggesting that harassment originates predominantly from known persons.  
40  
41 This may include peers who concurrently bully them offline as has been reported by  
42  
43 others [11 45 67]. This could not be verified within this study design as there was no  
44  
45 specific enquiry to determine if respondents were harassed online and offline by the  
46  
47 same individuals. The higher prevalence of online harassment compared to unwanted  
48  
49 sexual solicitation resembles the pattern of offline victimization found in this study  
50  
51 and other studies, where levels of physical and psychological victimization exceed  
52  
53 sexual victimization [68 69].  
54  
55  
56  
57  
58  
59  
60

1  
2  
3  
4  
5  
6  
7  
8 The higher levels of online harassment experienced by boys in this study has also  
9  
10 been reported in other Asian studies [11 15]. This is likely to be related to gender  
11  
12 differences in online behaviour. In this study, the most important predictors of  
13  
14 frequent online victimization were online perpetration of harassment and unwanted  
15  
16 sexual solicitation followed by the posting of revealing pictures (Table 3). These  
17  
18 behaviours were more prevalent in boys, who also had a significantly higher  
19  
20 prevalence of engagement in multiple risky online behaviours (Figure 2). While a  
21  
22 number of studies have found increased electronic aggression directed at girls and a  
23  
24 few others reported no gender differences, these have been conducted in Western  
25  
26 populations [2 14 31 32 34-38]. We postulate that cultural conditioning and  
27  
28 expectations may partly account for these differences [11]. In Asian communities  
29  
30 including Malaysia, there is greater tolerance for aggressive behaviour in boys, who  
31  
32 are encouraged to be assertive. In contrast, rude or aggressive behaviour, initiating  
33  
34 sexual conversations or sharing of revealing photographs by girls evokes criticism,  
35  
36 even from peers. This may inhibit their online behaviour and lower their risk of online  
37  
38 victimization. These differences suggest that victimization patterns may vary across  
39  
40 cultures. This reinforces the value of conducting local research to determine the  
41  
42 applicability of international data to specific settings.  
43  
44  
45  
46  
47  
48

49 The prevalence of unwanted sexual solicitation in this study is higher than recent U.S.  
50  
51 studies whereas research from Europe has revealed a wide variation [7 9]. The steady  
52  
53 decline in the U.S. has been attributed to increased consciousness with the  
54  
55 introduction of Internet safety education programmes as well as changing patterns of  
56  
57  
58  
59  
60

1  
2  
3 use and better law enforcement. In comparison, safety education programmes are in  
4  
5 early stages of development in Malaysia. In contrast to other studies, the absence of  
6  
7 gender differences in this study is consistent with previous Malaysian studies on  
8  
9 offline victimization [70 71]. This could be related to greater involvement of boys  
10  
11 with online perpetration and risky behaviour such as posting of revealing images on  
12  
13 their SNS profile. With the widespread utilization of SNS by the majority of youth for  
14  
15 an ever-growing range of functions related to leisure activities and social  
16  
17 communication, it is postulated that the time spent online may not be a discriminator  
18  
19 of victimization risk, unlike earlier studies [21]. This may explain why the duration of  
20  
21 time spent online was not a predictor of victimization in this study.  
22  
23  
24  
25  
26

27 Personal information disclosure other than the posting of revealing images was  
28  
29 associated with a marginal increase in the odds of online victimization. Marked risk  
30  
31 escalation occurred only when this was combined with a number of other behaviours.  
32  
33 This extends the evidence found in another U.S.-based study where engagement in 4  
34  
35 types of online behaviour was associated with a steep rise in the risk of online  
36  
37 interpersonal victimization [44]. Among component behaviours, uploading personal  
38  
39 revealing photographs and online perpetration were major contributors to risk of  
40  
41 online victimization in this study. Involvement in 4 or more listed types of behaviour  
42  
43 was seen in less than 10% of respondents in this study. Participation in multiple types  
44  
45 of risky behaviour may be a possible marker of individuals with a greater willingness  
46  
47 to forgo privacy for self-disclosure as well as to provoke others [2 42 66 72]. Instead  
48  
49 of targeting individual types of behaviour in isolation, understanding the psyche of  
50  
51 adolescents who belong to this high-risk group may yield more useful strategies for  
52  
53 prevention and suggests directions for future research.  
54  
55  
56  
57  
58  
59  
60

1  
2  
3  
4  
5 Demonstration of the association of frequent online victimization with offline  
6  
7 victimization experiences and parental conflict underlines the importance of taking  
8  
9 into account broader contextual factors in formulating an understanding of  
10  
11 contributors to the risk of online victimization. The adverse psychosocial impact of  
12  
13 previous victimization may result in emotional dysregulation and lack of social  
14  
15 competence. Convergence of psychosocial difficulties with family conflict and weak  
16  
17 family ties may increase an individual's risk of becoming a target of victimization in  
18  
19 different ways. Affected persons may be drawn into intimate interactions online,  
20  
21 exercise less discretion in their uploading of content and have an increased propensity  
22  
23 to express hostility in their online exchanges [16 22 43].  
24  
25  
26  
27  
28

29  
30 The study findings that both online and offline perpetration are important predictors  
31  
32 of online victimization adds to evidence from previous studies [43]. Examining  
33  
34 underlying motivations and triggers of this form of aggression would be a logical step  
35  
36 to address online victimization. As adolescents seek to establish their identity and  
37  
38 grapple with issues relating to intimacy and sexuality [48], aggression may be  
39  
40 employed as a strategy offline and online to establish and maintain social dominance.  
41  
42 This could result in subsequent targeting for victimization by rivals [73].  
43  
44  
45  
46

47  
48 The following study limitations are acknowledged. Results are based on self-reporting  
49  
50 which is subject to distortion from errors in recollection and social-desirability biases  
51  
52 that could result in underreporting [48]. The high response rate and the anonymity  
53  
54 assured in the study increased the possibility of reporting an unwanted experience  
55  
56 among the adolescents. The cross-sectional design limits inferences regarding the  
57  
58  
59  
60

1  
2  
3 direction of associations found. The relationship between perpetration and  
4  
5 victimization may be bidirectional, i.e. perpetration could result in victimization or be  
6  
7 a reaction to victimization, extending across online and offline interaction. In  
8  
9 addition, other factors such as academic performance [15 37], sexual orientation [74]  
10  
11 and conduct problems [22 45] which have been found to be associated with online  
12  
13 victimization were not explored in this study. The narrow age range and  
14  
15 predominantly Malay respondents in this sample limits generalizability. Further  
16  
17 studies across a wider age group could be a direction for future research.  
18  
19  
20  
21  
22

## 23 CONCLUSION

24  
25 More than half of Malaysian youth SNS users have encountered victimization both  
26  
27 online and offline. Approximately one third have engaged in perpetration online and  
28  
29 offline. Boys experienced more frequent online harassment compared to girls.  
30  
31 However there were no significant gender differences in experiences of unwanted  
32  
33 sexual solicitation online. Engagement in online perpetration and multiple types of  
34  
35 online risky behaviour was more prevalent in boys and associated with higher odds of  
36  
37 frequent online victimization. Experiences of offline victimization, parental conflict  
38  
39 and engagement in perpetration offline were also associated with higher odds of  
40  
41 frequent online victimization.  
42  
43  
44  
45  
46  
47

48 The study establishes that perpetration behaviour both online and offline should be an  
49  
50 important target for intervention to prevent online electronic aggression, with a  
51  
52 particular focus on boys. It also demonstrates the need to equip both genders with  
53  
54 coping strategies to deal with unwanted sexual solicitation [43]. While specific  
55  
56 affordances within platforms may facilitate victimization and evolve with  
57  
58  
59  
60

1  
2  
3 development of new technologies, the focus should be on equipping youth with skills  
4  
5 in communication and decision-making in relationships that can be applied across a  
6  
7 spectrum of contexts both online and offline [63]. The findings of a high prevalence  
8  
9 of offline victimization and its association with online victimization suggest that  
10  
11 prevention efforts should be directed across a broad spectrum of victimization types  
12  
13 instead of diverting resources to focus on online victimization [13]. In addition,  
14  
15 adolescent health care professionals should be aware of the need to explore other  
16  
17 forms of victimization in adolescents who disclose online victimization [68].  
18  
19  
20  
21  
22

### 23 **CONTRIBUTORSHIP STATEMENT**

24  
25 Mary J Marret conceived the study design, supervised the data collection and wrote  
26  
27 the manuscript.  
28

29  
30 Wan-Yuen Choo carried out the statistical analysis and co-wrote the manuscript.  
31  
32

### 33 **ACKNOWLEDGMENTS**

34  
35  
36 The authors express their gratitude to the Malaysian Ministry of Education and  
37  
38 various schools for study approval, the University of Malaya for funding and  
39  
40 administrative support and Ms Mogana Subramani for assistance with data collection.  
41

42  
43 We thank the students for their willingness to participate in this study.  
44  
45  
46

### 47 **COMPETING INTERESTS**

48  
49 The authors have no competing interests to declare.  
50  
51  
52

### 53 **FUNDING**

54  
55  
56  
57  
58  
59  
60

This study was funded by grants (UMRG 392//11HTM & GC001B-14HTM) from the University of Malaya.

## DATA SHARING STATEMENT

The dataset for this research has not yet been uploaded into a data repository.

## REFERENCES

1. Kowalski RM, Limber SP. Electronic Bullying Among Middle School Students. *Journal of Adolescent Health* 2007;**41**(6, Supplement):S22-S30 doi: <http://dx.doi.org/10.1016/j.jadohealth.2007.08.017>[published Online First: Epub Date]].
2. Lenhart A, Madden M, Smith A, et al. *Teens, Kindness and Cruelty on Social Network Sites*. Washington D.C.: Pew Research Center, 2011.
3. Tokunaga RS. Following you home from school: A critical review and synthesis of research on cyberbullying victimization. *Computers in Human Behavior* 2010;**26**(3):277-87 doi: <http://dx.doi.org/10.1016/j.chb.2009.11.014>[published Online First: Epub Date]].
4. Arslan S, Savaser S, Hallett V, et al. Cyberbullying among primary school students in Turkey: self-reported prevalence and associations with home and school life. *Cyberpsychology, Behavior And Social Networking* 2012;**15**(10):527-33 doi: 10.1089/cyber.2012.0207[published Online First: Epub Date]].
5. Finkelhor D, Mitchell K, Wolak J. *Online Victimization: A Report on the Nation's Youth*. Virginia: National Center for Missing and Exploited Children, 2000.
6. Hinduja S, Patchin JW. Social influences on cyberbullying behaviors among middle and high school students. *Journal of Youth and Adolescence* 2013;**42**(5):711-22 doi: 10.1007/s10964-012-9902-4[published Online First: Epub Date]].
7. Jones LM, Mitchell KJ, Finkelhor D. Trends in Youth Internet Victimization: Findings From Three Youth Internet Safety Surveys 2000–2010. *Journal of Adolescent Health* 2012;**50**(2):179-86 doi: 10.1016/j.jadohealth.2011.09.015[published Online First: Epub Date]].
8. Juvonen J, Gross EF. Extending the School Grounds?—Bullying Experiences in Cyberspace. *Journal of School Health* 2008;**78**(9):496-505
9. Staksrud E, Livingstone S. Children and online risk. *Information, Communication & Society* 2009;**12**(3):364-87 doi: 10.1080/13691180802635455[published Online First: Epub Date]].
10. Ybarra ML, Mitchell KJ. Online aggressor/targets, aggressors, and targets: a comparison of associated youth characteristics. *Journal of Child Psychology and Psychiatry* 2004;**45**(7):1308-16 doi: 10.1111/j.1469-7610.2004.00328.x[published Online First: Epub Date]].
11. Zhou Z, Tang H, Tian Y, et al. Cyberbullying and its risk factors among Chinese high school students. *School Psychology International* 2013;**34**(6):630-47 doi: 10.1177/0143034313479692[published Online First: Epub Date]].
12. David-Ferdon C, Hertz MF. Electronic Media, Violence, and Adolescents: An Emerging Public Health Problem. *Journal of Adolescent Health* 2007;**41**(6, Supplement):S1-S5 doi: <http://dx.doi.org/10.1016/j.jadohealth.2007.08.020>[published Online First: Epub Date]].



13. Salmivalli C, Sainio M, Hodges EVE. Electronic victimization: correlates, antecedents, and consequences among elementary and middle school students. *Journal Of Clinical Child And Adolescent Psychology: The Official Journal For The Society Of Clinical Child And Adolescent Psychology, American Psychological Association, Division 53* 2013;**42**(4):442-53 doi: 10.1080/15374416.2012.759228[published Online First: Epub Date]].
14. Staksrud E, Ólafsson K, Livingstone S. Does the use of social networking sites increase children's risk of harm? *Computers in Human Behavior* 2013;**29**(1):40-50 doi: <http://dx.doi.org/10.1016/j.chb.2012.05.026>[published Online First: Epub Date]].
15. Chang F-C, Lee C-M, Chiu C-H, et al. Relationships among cyberbullying, school bullying, and mental health in Taiwanese adolescents. *The Journal Of School Health* 2013;**83**(6):454-62 doi: 10.1111/josh.12050[published Online First: Epub Date]].
16. Wolak J, Finkelhor D, Mitchell KJ, et al. Online "Predators" and their victims - Myths, realities, and implications for prevention and treatment. *Am Psychol* 2008;**63**(2):111-28 doi: Doi 10.1037/0003-066x.63.2.111[published Online First: Epub Date]].
17. Elgar FJ, Napoletano A, Saul G, et al. Cyberbullying victimization and mental health in adolescents and the moderating role of family dinners. *JAMA Pediatrics* 2014;**168**(11):1015-22 doi: 10.1001/jamapediatrics.2014.1223[published Online First: Epub Date]].
18. Selkie EM, Fales JL, Moreno MA. Cyberbullying Prevalence Among US Middle and High School-Aged Adolescents: A Systematic Review and Quality Assessment. *Journal of Adolescent Health* 2015;**58**(2):125-33 doi: 10.1016/j.jadohealth.2015.09.026[published Online First: Epub Date]].
19. Korchmaros JD, Mitchell KJ, Ybarra ML. Technology-based interpersonal victimization: predictors of patterns of victimization over time. *Journal Of Interpersonal Violence* 2014;**29**(7):1297-317 doi: 10.1177/0886260513506277[published Online First: Epub Date]].
20. Brandtzæg PB, Staksrud E, Hagen I, et al. Norwegian Children's Experiences of Cyberbullying When Using Different Technological Platforms. *Journal of Children and Media* 2009;**3**(4):349-65 doi: 10.1080/17482790903233366[published Online First: Epub Date]].
21. Wolak J, Mitchell KJ, Finkelhor D. Does Online Harassment Constitute Bullying? An Exploration of Online Harassment by Known Peers and Online-Only Contacts. *Journal of Adolescent Health* 2007;**41**(6, Supplement):S51-S58 doi: <http://dx.doi.org/10.1016/j.jadohealth.2007.08.019>[published Online First: Epub Date]].
22. Ybarra ML, Espelage DL, Mitchell KJ. The Co-occurrence of Internet Harassment and Unwanted Sexual Solicitation Victimization and Perpetration: Associations with Psychosocial Indicators. *Journal of Adolescent Health* 2007;**41**(6, Supplement):S31-S41 doi: <http://dx.doi.org/10.1016/j.jadohealth.2007.09.010>[published Online First: Epub Date]].
23. Mitchell KJ, Wolak J, Finkelhor D. Are blogs putting youth at risk for online sexual solicitation or harassment? *Child Abuse & Neglect* 2008;**32**(2):277-94 doi: <http://dx.doi.org/10.1016/j.chiabu.2007.04.015>[published Online First: Epub Date]].
24. Wolak J, Finkelhor D, Mitchell K. Internet-initiated sex crimes against minors: Implications for prevention based on findings from a national study. *Journal of Adolescent Health* 2004;**35**(5):424.e11-24.e20 doi: <http://dx.doi.org/10.1016/j.jadohealth.2004.05.006>[published Online First: Epub Date]].
25. Mitchell KJ, Finkelhor D, Wolak J. The Internet and Family and Acquaintance Sexual Abuse. *Child Maltreatment* 2005;**10**(1):49-60 doi: 10.1177/1077559504271917[published Online First: Epub Date]].
26. Chang C. Internet Safety Survey: Who Will Protect the Children ? *Berkeley Technology Law Journal* 2010;**25**(1):501-27
27. Sourander A, Klomek AB, Ikonen M, et al. Psychosocial risk factors associated with cyberbullying among adolescents: A population-based study. *Archives of General Psychiatry* 2010;**67**(7):720-28 doi: 10.1001/archgenpsychiatry.2010.79[published Online First: Epub Date]].

- 1
- 2
- 3 28. Menesini E, Nocentini A, Palladino BE, et al. Cyberbullying definition among adolescents: a  
4 comparison across six European countries. *Cyberpsychology, Behavior And Social*  
5 *Networking* 2012;**15**(9):455-63 doi: 10.1089/cyber.2012.0040[published Online First: Epub  
6 Date]].
- 7 29. Hinduja S, Patchin JW. Offline consequences of online victimization: school violence and  
8 delinquency. *Journal of School Violence* 2007;**6**(3):89-112
- 9 30. Mishna F. *Bullying: A Guide to Research, Intervention and Prevention*. Oxford: Oxford University  
10 Press, 2012.
- 11 31. Williams KR, Guerra NyG. Prevalence and Predictors of Internet Bullying. *Journal of Adolescent*  
12 *Health* 2007;**41**(6, Supplement):S14-S21 doi:  
13 <http://dx.doi.org/10.1016/j.jadohealth.2007.08.018>[published Online First: Epub Date]].
- 14 32. Lindfors PL, Kaltiala-Heino R, Rimpelä AH. Cyberbullying among Finnish adolescents--a  
15 population-based study. *BMC Public Health* 2012;**12**:1027-27 doi: 10.1186/1471-2458-12-  
16 1027[published Online First: Epub Date]].
- 17 33. Shapka JD, Law DM. Does one size fit all? Ethnic differences in parenting behaviors and  
18 motivations for adolescent engagement in cyberbullying. *Journal of Youth and Adolescence*  
19 2013;**42**(5):723-38 doi: 10.1007/s10964-013-9928-2[published Online First: Epub Date]].
- 20 34. Wang J, Iannotti RJ, Nansel TR. School Bullying Among Adolescents in the United States: Physical,  
21 Verbal, Relational, and Cyber. *Journal of Adolescent Health* 2009;**45**(4):368-75 doi:  
22 <http://dx.doi.org/10.1016/j.jadohealth.2009.03.021>[published Online First: Epub Date]].
- 23 35. Ortega R, Elipe P, Mora-Merchan JA, et al. The Emotional Impact on Victims of Traditional  
24 Bullying and Cyberbullying. *Zeitschrift für Psychologie / Journal of Psychology*  
25 2009;**217**(4):197-204 doi: doi:10.1027/0044-3409.217.4.197[published Online First: Epub  
26 Date]].
- 27 36. Wade A, Beran T. Cyberbullying: The New Era of Bullying. *Canadian Journal of School Psychology*  
28 2011;**26**(1):44-61 doi: 10.1177/0829573510396318[published Online First: Epub Date]].
- 29 37. Floros GD, Siomos KE, Fisoun V, et al. Adolescent online cyberbullying in Greece: the impact of  
30 parental online security practices, bonding, and online impulsiveness. *The Journal Of School*  
31 *Health* 2013;**83**(6):445-53 doi: 10.1111/josh.12049[published Online First: Epub Date]].
- 32 38. Li Q. Cyberbullying in Schools: A Research of Gender Differences. *School Psychology International*  
33 2006;**27**(2):157-70 doi: 10.1177/0143034306064547[published Online First: Epub Date]].
- 34 39. Hinduja S, Patchin JW. Cyberbullying: An Exploratory Analysis of Factors Related to Offending and  
35 Victimization. *Deviant Behavior* 2008;**29**(2):129-56 doi:  
36 10.1080/01639620701457816[published Online First: Epub Date]].
- 37 40. Aricak T, Siyahhan S, Uzunhasanoglu A, et al. Cyberbullying among Turkish adolescents.  
38 *Cyberpsychology & behavior : the impact of the Internet, multimedia and virtual reality on*  
39 *behavior and society* 2008;**11**(3):253-61 doi: 10.1089/cpb.2007.0016[published Online First:  
40 Epub Date]].
- 41 41. Cohen LE, Felson M. Social Change and Crime Rate Trends: A Routine Activity Approach.  
42 *American Sociological Review* 1979;**44**(4):588-608 doi: 10.2307/2094589[published Online  
43 First: Epub Date]].
- 44 42. Mesch GS. Parental Mediation, Online Activities, and Cyberbullying. *CyberPsychology & Behavior*  
45 2009;**12**(4):387-93 doi: 10.1089/cpb.2009.0068[published Online First: Epub Date]].
- 46 43. Mitchell KJ, Finkelhor D, Wolak J. Youth internet users at risk for the most serious online sexual  
47 solicitations. *Am J Prev Med* 2007;**32**(6):532-37
- 48 44. Ybarra M, Mitchell KJ, Finkelhor D, et al. Internet Prevention Messages: Targeting the Right  
49 Online Behaviors. *Archives of Pediatrics and Adolescent Medicine* 2007;**161**(2):138-45
- 50 45. Ybarra ML, Diener-West M, Leaf PJ. Examining the Overlap in Internet Harassment and School  
51 Bullying: Implications for School Intervention. *Journal of Adolescent Health* 2007;**41**(6,  
52 Supplement):S42-S50 doi: <http://dx.doi.org/10.1016/j.jadohealth.2007.09.004>[published  
53 Online First: Epub Date]].
- 54
- 55
- 56
- 57
- 58
- 59
- 60

- 1
- 2
- 3 46. Modecki KL, Barber BL, Vernon L. Mapping developmental precursors of cyber-aggression:  
4 trajectories of risk predict perpetration and victimization. *Journal of Youth and Adolescence*  
5 2013;**42**(5):651-61 doi: 10.1007/s10964-012-9887-z[published Online First: Epub Date]].
- 6 47. Mitchell K, Ybarra M, Finkelhor D. The Relative Importance of Online Victimization in  
7 Understanding Depression, Delinquency, and Substance Use. *Child Maltreatment*  
8 2007;**12**(4):314-24
- 9 48. Valkenburg PM, Peter J. Online communication among adolescents:an integrated model of its  
10 attraction, opportunities, and risks. *Journal of Adolescent Health* 2011;**48**(2):121-27
- 11 49. Wolak J, Finkelhor D, Mitchell K. Is talking online to unknown people always risky? Distinguishing  
12 online interaction styles in a national sample of youth Internet users. *Cyberpsychology &*  
13 *Behavior* 2008;**11**(3):340-43
- 14 50. Digi Telecommunications. Safety Net: Growing Awareness among Malaysian schoolchildren on  
15 Staying Safe Online. A National Survey Report 2013. Shah Alam, Selangor, 2013.
- 16 51. Digi Telecommunications. Safety Net: Capacity Building Among Malaysian Schoolchildren on  
17 staying safe online. A National Survey Report 2014. Shah Alam, Selangor, 2014.
- 18 52. Digi Telecommunications. Growing Digital Resilience Among Malaysian Schoolchildren on Staying  
19 Safe Online. The National Survey Report 2015. Shah Alam, Selangor, 2015.
- 20 53. Moreno MA. Social networking sites and adolescents. *Pediatric Annals* 2010;**39**(9):565-68 doi:  
21 10.3928/00904481-20100825-07[published Online First: Epub Date]].
- 22 54. Tsitsika AK, Tzavela EC, Janikian M, et al. Online Social Networking in Adolescence: Patterns of  
23 Use in Six European Countries and Links With Psychosocial Functioning. *Journal of*  
24 *Adolescent Health* 2014;**55**(1):141-47 doi:  
25 <http://dx.doi.org/10.1016/j.jadohealth.2013.11.010>[published Online First: Epub Date]].
- 26 55. Messias E, Kindrick K, Castro J. School bullying, cyberbullying, or both: correlates of teen  
27 suicidality in the 2011 CDC Youth Risk Behavior Survey. *Comprehensive Psychiatry*  
28 2014;**55**(5):1063-68 doi: 10.1016/j.comppsy.2014.02.005[published Online First: Epub  
29 Date]].
- 30 56. Marret MJ, Choo WY. *Use of ICT by Minors: Key Project Findings*. Kuala Lumpur: University of  
31 Malaya, 2014.
- 32 57. Shin W, Ismail N. Exploring the Role of Parents and Peers in Young Adolescents' Risk Taking on  
33 Social Networking Sites. *CyberPsychology, Behavior & Social Networking* 2014;**17**(9):578-83  
34 doi: 10.1089/cyber.2014.0095[published Online First: Epub Date]].
- 35 58. Dunne MP, Zolotor AJ, Runyan DK, et al. ISPCAN Child Abuse Screening Tools Retrospective  
36 version (ICAST-R): Delphi study and field testing in seven countries. *Child Abuse & Neglect*  
37 2009;**33**(11):815-25 doi: <http://dx.doi.org/10.1016/j.chiabu.2009.09.005>[published  
38 Online First: Epub Date]].
- 39 59. Parker G, Roussos J, Hadzi-Pavlovic D, et al. The development of a refined measure of  
40 dysfunctional parenting and assessment of its relevance in patients with affective disorders.  
41 *Psychological Medicine* 1997;**27**(05):1193-203 doi:  
42 doi:10.1017/S003329179700545X[published Online First: Epub Date]].
- 43 60. Lenhart A. *Teens, Social Media and Technology Overview 2015*. Washington, D.C.: Pew Research  
44 Center, 2015.
- 45 61. Livingstone S, Haddon L, Gorzig A, et al. Risks and safety on the internet: the perspective of  
46 European children: full findings and policy implications from the EU Kids Online survey of 9-  
47 16 year olds and their parents in 25 countries. London: EU Kids Online Network, 2011.
- 48 62. Mascheroni G, Olafsson K. *Net Children Go Mobile: risks and opportunities*. Milan: Educatt, 2014.
- 49 63. Mitchell KJ, Jones LM, Finkelhor D, et al. Understanding the decline in unwanted online sexual  
50 solicitations for U.S. youth 2000–2010: Findings from three Youth Internet Safety Surveys.  
51 *Child Abuse & Neglect* 2013;**37**(12):1225-36 doi:  
52 <http://dx.doi.org/10.1016/j.chiabu.2013.07.002>[published Online First: Epub Date]].
- 53
- 54
- 55
- 56
- 57
- 58
- 59
- 60

- 1  
2  
3 64. Madden M, Lenhart A, Cortesi S, et al. Teens, Social Media, and Privacy. Washington, D.C.: Pew  
4 Research Center, 2013.
- 5 65. Peter J, Valkenburg PM, Schouten AP. Characteristics and Motives of Adolescents Talking with  
6 Strangers on the Internet. *CyberPsychology & Behavior* 2006;**9**(5):526-30 doi:  
7 10.1089/cpb.2006.9.526[published Online First: Epub Date]].
- 8 66. Liu C, Ang RP, Lwin MO. Cognitive, personality, and social factors associated with adolescents'  
9 online personal information disclosure. *Journal of Adolescence* 2013;**36**(4):629-38 doi:  
10 <http://dx.doi.org/10.1016/j.adolescence.2013.03.016>[published Online First: Epub Date]].
- 11 67. Price M, Dalgliesh J. Cyberbullying: Experiences, impacts and coping strategies as described by  
12 Australian young people. *Youth Studies Australia* 2010;**29**(2):51-59
- 13 68. Mitchell KJ, Finkelhor D, Wolak J, et al. Youth Internet Victimization in a Broader Victimization  
14 Context. *Journal of Adolescent Health* 2011;**48**(2):128-34 doi:  
15 <http://dx.doi.org/10.1016/j.jadohealth.2010.06.009>[published Online First: Epub Date]].
- 16 69. Feng J-Y, Chang Y-T, Chang H-Y, et al. Prevalence of different forms of child maltreatment among  
17 Taiwanese adolescents: A population-based study. *Child Abuse & Neglect* 2015;**42**:10-19 doi:  
18 <http://dx.doi.org/10.1016/j.chiabu.2014.11.010>[published Online First: Epub Date]].
- 19 70. Choo W-Y, Dunne MP, Marret MJ, et al. Victimization Experiences of Adolescents in Malaysia.  
20 *Journal of Adolescent Health* 2011;**49**(6):627-34 doi:  
21 <http://dx.doi.org/10.1016/j.jadohealth.2011.04.020>[published Online First: Epub Date]].
- 22 71. Marret MJ, Choo WY. Victimization After Meeting With Online Acquaintances: A Cross-Sectional  
23 Survey of Adolescents in Malaysia. *Journal Of Interpersonal Violence* 2016 doi:  
24 10.1177/0886260515625502[published Online First: Epub Date]].
- 25 72. Liao AK, Khoo A, Ang PH. Factors influencing adolescents engagement in risky Internet behavior.  
26 *Cyberpsychology & Behavior* 2005;**8**(6):513-20
- 27 73. Badaly D, Kelly BM, Schwartz D, et al. Longitudinal associations of electronic aggression and  
28 victimization with social standing during adolescence. *Journal of Youth and Adolescence*  
29 2013;**42**(6):891-904 doi: 10.1007/s10964-012-9787-2[published Online First: Epub Date]].
- 30 74. Schneider SK, O'Donnell L, Stueve A, et al. Cyberbullying, School Bullying, and Psychological  
31 Distress: A Regional Census of High School Students. *American Journal of Public Health*  
32 2012;**102**(1):171-77  
33  
34  
35  
36  
37  
38  
39  
40  
41  
42  
43  
44  
45  
46  
47  
48  
49  
50  
51  
52  
53  
54  
55  
56  
57  
58  
59  
60

1  
2  
3  
4  
5  
6  
7  
8  
9  
10  
11  
12  
13  
14  
15  
16  
17  
18  
19  
20  
21  
22  
23  
24  
25  
26  
27  
28  
29  
30  
31  
32  
33  
34  
35  
36  
37  
38  
39  
40  
41  
42  
43  
44  
45  
46  
47  
48  
49  
50  
51  
52  
53  
54  
55  
56  
57  
58  
59  
60

**Figure 1: Conceptual framework of factors which may affect exposure to online victimization**

**Figure 2: Cumulative risky online behaviour by gender**

For peer review only

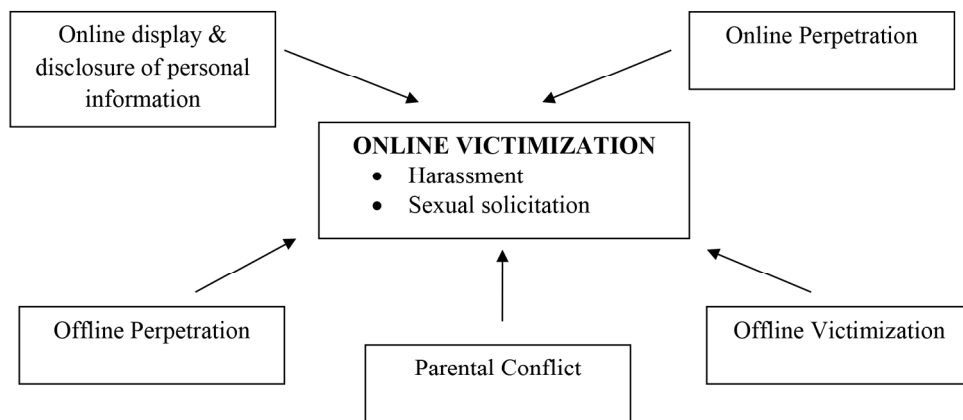

Figure 1: Conceptual framework of factors which may affect exposure to online victimization

172x85mm (300 x 300 DPI)

For peer review only

1  
2  
3  
4  
5  
6  
7  
8  
9  
10  
11  
12  
13  
14  
15  
16  
17  
18  
19  
20  
21  
22  
23  
24  
25  
26  
27  
28  
29  
30  
31  
32  
33  
34  
35  
36  
37  
38  
39  
40  
41  
42  
43  
44  
45  
46  
47  
48  
49  
50  
51  
52  
53  
54  
55  
56  
57  
58  
59  
60

1  
2  
3  
4  
5  
6  
7  
8  
9  
10  
11  
12  
13  
14  
15  
16  
17  
18  
19  
20  
21  
22  
23  
24  
25  
26  
27  
28  
29  
30  
31  
32  
33  
34  
35  
36  
37  
38  
39  
40  
41  
42  
43  
44  
45  
46  
47  
48  
49  
50  
51  
52  
53  
54  
55  
56  
57  
58  
59  
60

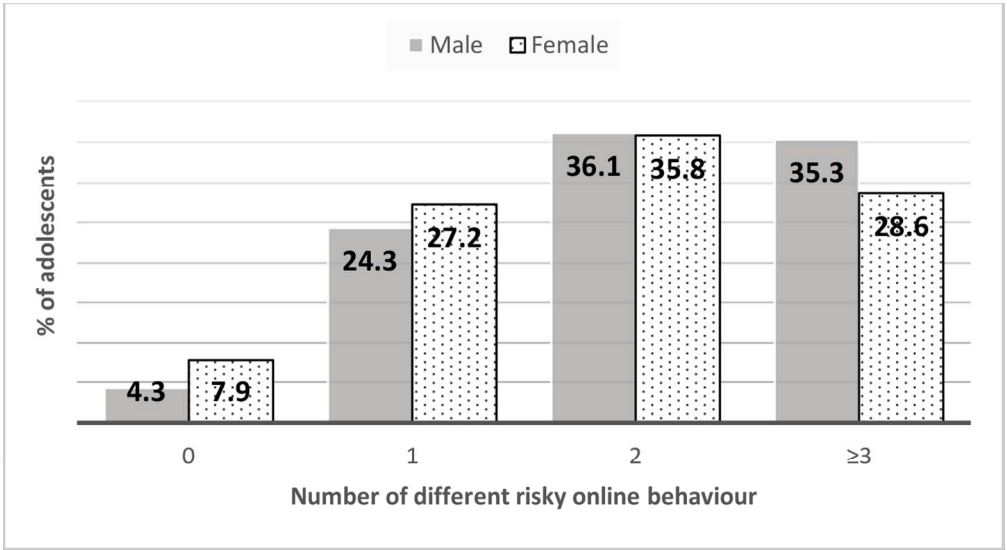

Figure 2: Cumulative risky online behaviour by gender

121x66mm (300 x 300 DPI)

review only

## Details of questionnaire used in survey

The following items were included in the questionnaire:

***Socio-demographic information.*** Items included were age, gender, ethnicity, place of residence, parents' marital status and parents' education level.

***Use of social networking sites (SNS).*** Items included were the age of initiation of SNS use, motivation for use, most frequently used SNS, number of SNS profiles, frequency and duration of access to SNS, number of SNS contacts and motivations for use

***Privacy settings and disclosure of personal information on SNS.*** Items included were the use of privacy settings on their SNS profiles and about specific behaviors pertaining to public display of personal information on user profiles as well as the sharing of personal information and interaction with "SNS contacts". The term SNS contacts denoted individuals encountered solely through a SNS without a prior face-to-face introduction.

Posting of personal information was measured by display of any of the following data on a publicly accessible profile: real name, photograph, residential address, name of school, telephone number

Disclosure of personal information was deemed to occur if any of the following data were sent to an SNS contact: real name, photograph, address, name of school, telephone number

Posting of revealing images was deemed to occur if an image (either a still photograph or video) of the respondent clad only in a swimsuit or undergarments was displayed on a publicly accessible SNS profile



1  
2  
3           Interaction with strangers was deemed to occur if respondents accepted “friend  
4 requests” from individuals unknown to them or communicated with such  
5 individuals through chat, replying of messages or posting comments on their  
6 wall  
7  
8  
9  
10  
11

12  
13       ***Victimization on SNS.*** The following items assessed victimization within the previous 12  
14 months under categories of harassment and unwanted sexual solicitation. The frequency of  
15 these experiences was indicated on a 6-point scale which ranged from “daily or almost daily”  
16 to “never”. To facilitate statistical analysis, the responses were grouped under three categories:  
17  
18 (1) frequent (experiences occurred at least a few times a year) (2) infrequent (experiences  
19 occurred once in the past 12 months) (3) never  
20  
21  
22  
23  
24  
25  
26  
27

28  
29           Harassment was measured through 3 questions adapted from the Growing Up  
30 with Media Survey (whether someone made rude or mean comments, spread  
31 rumours whether they were true or not, made threatening or aggressive remarks  
32  
33 [1]  
34  
35  
36  
37  
38  
39  
40

41           Unwanted sexual solicitation was measured with 3 questions adapted from the  
42 Youth Internet Safety Survey (whether someone had forced sexual talk when  
43 they were unwilling, whether someone had asked for sexual information about  
44 themselves which they were unwilling to share or if someone had asked them  
45 to do something sexual against their will) [2].  
46  
47  
48  
49  
50  
51  
52  
53  
54  
55  
56  
57  
58  
59  
60

1  
2  
3 Previous studies have shown high reliability for both instruments. The internal  
4 reliability estimated with Cronbach's Alpha was .93 for Internet sexual solicitation  
5  
6  
7  
8  
9  
10  
11  
12  
13  
14  
15  
16  
17  
18  
19  
20  
21  
22  
23  
24  
25  
26  
27  
28  
29  
30  
31  
32  
33  
34  
35  
36  
37  
38  
39  
40  
41  
42  
43  
44  
45  
46  
47  
48  
49  
50  
51  
52  
53  
54  
55  
56  
57  
58  
59  
60

Previous studies have shown high reliability for both instruments. The internal reliability estimated with Cronbach's Alpha was .93 for Internet sexual solicitation victimization and 0.79 for Internet harassment victimization [1 3 4].

***Perpetration on SNS.*** The following items assessed self-reported online perpetration within the previous 12 months under categories of harassment and unwanted sexual solicitation. The frequency of these actions was indicated on a 6-point scale which ranged from "daily or almost daily" to "never". To facilitate statistical analysis, the responses were grouped under three categories: (1) frequent (respondents did this at least a few times a year) (2) infrequent (respondents did this once in the past 12 months) (3) never.

Perpetration of harassment was measured with three questions from the Growing Up with Media Survey (making rude or mean comments, spreading rumours about someone whether they were true or not, directing threatening or aggressive comments towards others on SNS) [1].

Perpetration of unwanted sexual solicitation was measured with three questions adapted from the Youth Internet Safety Survey (forcing others to engage in sexual talk, asking for sexual information or asking another to do something sexual when they were unwilling) [1].

The internal reliability for the measures was estimated with Cronbach's Alpha: Perpetration of harassment (Cronbach .82); and Perpetration of unwanted sexual solicitation (Cronbach .93) [1].

1  
2  
3 **Experiences of offline victimization.** Lifetime experiences of offline victimization were  
4 assessed using the validated ISPCAN Child Abuse Screening tool for young adults Version  
5 ICAST-R with 5 stem questions each assessing three domains of offline victimization (sexual  
6 abuse, physical abuse or psychological abuse). For each stem question, the response options  
7 were: (1) yes; (2) no and (3) cannot remember. For each positive response, follow-up questions  
8 enquired about the frequency of maltreatment experiences and the category of the perpetrator.  
9 A positive response to at least one stem question denoted victimization in that particular  
10 domain. A summary index indicating the number of categories of victimization was created  
11 ranging from 0 (none) to 3 (all three types). Previous studies have shown moderate to high  
12 reliability [5].  
13  
14  
15  
16  
17  
18  
19  
20  
21  
22  
23  
24  
25  
26  
27

28 **Offline bullying.** Lifetime perpetration of offline bullying was assessed using 4 stem questions  
29 to measure three domains (1) psychological (not allowing a peer to join in a group out of anger  
30 or hostility, spreading rumours about someone whether they were untrue or not) (2) physical  
31 (pushing, beating or slapping a peer) (3) sexual (kissing or touching a peer sexually when they  
32 did not consent). For each item, respondents were asked the frequency of these actions on a 6-  
33 point scale from “daily or almost daily” to “never” [1]. A summary index of the number of types  
34 of perpetration was created ranging from 0 (none) to 3 (all three types).  
35  
36  
37  
38  
39  
40  
41  
42  
43  
44  
45

46 **Parental conflict.** A validated version of the Measure of Parenting Style (MOPS) was used to  
47 assess parental conflict levels with 15 core items assessing Parental Indifference (6 items),  
48 Parental Over-Control (4 items), and Parental Abuse (5 items). Responses were scored on a 4-  
49 point Likert type scale as follows: 0 = not true at all; 1 = slightly true; 2 = moderately true; 3 =  
50 extremely true. A total score was derived from summation of scores for all the items with higher  
51 scores indicating greater levels of parental conflict. The instrument has shown moderate to high  
52 reliability and validity. Previous studies with Cronbach's alphas ranging from .76 to .93 suggest  
53  
54  
55  
56  
57  
58  
59  
60

1  
2  
3 that the measures are within acceptable internal consistency while test-retest coefficients for  
4  
5  
6 the subscale ranged from 0.74 to 0.94, indicating high to moderate consistency [6].  
7  
8  
9  
10  
11  
12  
13  
14  
15  
16

- 17 1. Ybarra ML, Espelage DL, Mitchell KJ. The Co-occurrence of Internet Harassment and Unwanted  
18 Sexual Solicitation Victimization and Perpetration: Associations with Psychosocial Indicators.  
19 Journal of Adolescent Health 2007;**41**(6, Supplement):S31-S41 doi:  
20 <http://dx.doi.org/10.1016/j.jadohealth.2007.09.010>[published Online First: Epub Date]].  
21
- 22 2. Ybarra ML, Mitchell KJ, Finkelhor D, et al. Internet prevention messages: Targeting the right online  
23 behaviors. Archives of Pediatrics & Adolescent Medicine 2007;**161**(2):138  
24
- 25 3. Finkelhor D, Mitchell K, Wolak J. Online Victimization of Youth: Five Years Later. 2007  
26
- 27 4. Wolak J, Mitchell K, Finkelhor D. Online Victimization of Youth: Five Years Later. Virginia: National  
28 Center for Missing and Exploited Children, 2006.  
29
- 30 5. Dunne MP, Zolotor AJ, Runyan DK, et al. ISPCAN child abuse screening tools retrospective version  
31 (ICAST-R): Delphi study and field testing in seven countries. Child abuse & neglect  
32 2009;**33**(11):815-25  
33
- 34 6. Parker G, Roussos J, Hadzi-Pavlovic D, et al. The development of a refined measure of  
35 dysfunctional parenting and assessment of its relevance in patients with affective disorders.  
36 Psychological Medicine 1997;**27**(05):1193-203 doi:  
37 doi:10.1017/S003329179700545X[published Online First: Epub Date]].  
38  
39  
40  
41  
42  
43  
44  
45  
46  
47  
48  
49  
50  
51  
52  
53  
54  
55  
56  
57  
58  
59  
60

STROBE 2007 (v4) Statement—Checklist of items that should be included in reports of cross-sectional studies

| Section/Topic            | Item # | Recommendation                                                                                                                                                                       | Reported on page #     |
|--------------------------|--------|--------------------------------------------------------------------------------------------------------------------------------------------------------------------------------------|------------------------|
| Title and abstract       | 1      | (a) Indicate the study’s design with a commonly used term in the title or the abstract                                                                                               | Title & abstract 1-2   |
|                          |        | (b) Provide in the abstract an informative and balanced summary of what was done and what was found                                                                                  | Title & abstract 2     |
| <b>Introduction</b>      |        |                                                                                                                                                                                      |                        |
| Background/rationale     | 2      | Explain the scientific background and rationale for the investigation being reported                                                                                                 | Introduction 4-6       |
| Objectives               | 3      | State specific objectives, including any prespecified hypotheses                                                                                                                     | Introduction 6-7       |
| <b>Methods</b>           |        |                                                                                                                                                                                      |                        |
| Study design             | 4      | Present key elements of study design early in the paper                                                                                                                              | Methods 7-8            |
| Setting                  | 5      | Describe the setting, locations, and relevant dates, including periods of recruitment, exposure, follow-up, and data collection                                                      | Methods 7-8            |
| Participants             | 6      | (a) Give the eligibility criteria, and the sources and methods of selection of participants                                                                                          | Methods 7-8            |
| Variables                | 7      | Clearly define all outcomes, exposures, predictors, potential confounders, and effect modifiers. Give diagnostic criteria, if applicable                                             | Methods 7-9            |
| Data sources/measurement | 8*     | For each variable of interest, give sources of data and details of methods of assessment (measurement). Describe comparability of assessment methods if there is more than one group | Methods 7-9            |
| Bias                     | 9      | Describe any efforts to address potential sources of bias                                                                                                                            | Procedure 7-8          |
| Study size               | 10     | Explain how the study size was arrived at                                                                                                                                            | Sample 7               |
| Quantitative variables   | 11     | Explain how quantitative variables were handled in the analyses. If applicable, describe which groupings were chosen and why                                                         | Statistical analysis 9 |
| Statistical methods      | 12     | (a) Describe all statistical methods, including those used to control for confounding                                                                                                | Statistical analysis 9 |
|                          |        | (b) Describe any methods used to examine subgroups and interactions                                                                                                                  | Statistical analysis 9 |
|                          |        | (c) Explain how missing data were addressed                                                                                                                                          | Statistical analysis 9 |
|                          |        | (d) If applicable, describe analytical methods taking account of sampling strategy                                                                                                   | Not applicable         |
|                          |        | (e) Describe any sensitivity analyses                                                                                                                                                | Not applicable         |
| <b>Results</b>           |        |                                                                                                                                                                                      |                        |

|                          |     |                                                                                                                                                                                                              |                            |
|--------------------------|-----|--------------------------------------------------------------------------------------------------------------------------------------------------------------------------------------------------------------|----------------------------|
| Participants             | 13* | (a) Report numbers of individuals at each stage of study—eg numbers potentially eligible, examined for eligibility, confirmed eligible, included in the study, completing follow-up, and analysed            | Statistical analysis 7 & 9 |
|                          |     | (b) Give reasons for non-participation at each stage                                                                                                                                                         | Sample 7                   |
|                          |     | (c) Consider use of a flow diagram                                                                                                                                                                           | Explained in text 7& 9     |
| Descriptive data         | 14* | (a) Give characteristics of study participants (eg demographic, clinical, social) and information on exposures and potential confounders                                                                     | Results 9 - 17             |
|                          |     | (b) Indicate number of participants with missing data for each variable of interest                                                                                                                          | Statistical analysis 9     |
| Outcome data             | 15* | Report numbers of outcome events or summary measures                                                                                                                                                         | Results 9 - 17             |
| Main results             | 16  | (a) Give unadjusted estimates and, if applicable, confounder-adjusted estimates and their precision (eg, 95% confidence interval). Make clear which confounders were adjusted for and why they were included | Results 9-17               |
|                          |     | (b) Report category boundaries when continuous variables were categorized                                                                                                                                    | Results 9 - 17             |
|                          |     | (c) If relevant, consider translating estimates of relative risk into absolute risk for a meaningful time period                                                                                             | Not relevant               |
| Other analyses           | 17  | Report other analyses done—eg analyses of subgroups and interactions, and sensitivity analyses                                                                                                               | Results 9 -17              |
| <b>Discussion</b>        |     |                                                                                                                                                                                                              |                            |
| Key results              | 18  | Summarise key results with reference to study objectives                                                                                                                                                     | Discussion 17 - 21         |
| Limitations              | 19  | Discuss limitations of the study, taking into account sources of potential bias or imprecision. Discuss both direction and magnitude of any potential bias                                                   | Discussion 17 -21          |
| Interpretation           | 20  | Give a cautious overall interpretation of results considering objectives, limitations, multiplicity of analyses, results from similar studies, and other relevant evidence                                   | Discussion 17 -21          |
| Generalisability         | 21  | Discuss the generalisability (external validity) of the study results                                                                                                                                        | Discussion 17 -21          |
| <b>Other information</b> |     |                                                                                                                                                                                                              |                            |
| Funding                  | 22  | Give the source of funding and the role of the funders for the present study and, if applicable, for the original study on which the present article is based                                                | Funding 23                 |

\*Give information separately for cases and controls in case-control studies and, if applicable, for exposed and unexposed groups in cohort and cross-sectional studies.

**Note:** An Explanation and Elaboration article discusses each checklist item and gives methodological background and published examples of transparent reporting. The STROBE checklist is best used in conjunction with this article (freely available on the Web sites of PLoS Medicine at <http://www.plosmedicine.org/>, Annals of Internal Medicine at <http://www.annals.org/>, and Epidemiology at <http://www.epidem.com/>). Information on the STROBE Initiative is available at [www.strobe-statement.org](http://www.strobe-statement.org).
